# Supplementary material for: Host Species and Environmental Effects on Bacterial Communities Associated with Drosophila in the Laboratory and in the Natural Environment
Source: PLOS journal article supplement (doi:10.1371/journal.pone.0070749), 2013-08-13
Supplement: S1 (10.1371/journal.pone.0070749.s001) [file journal.pone.0070749.s001]

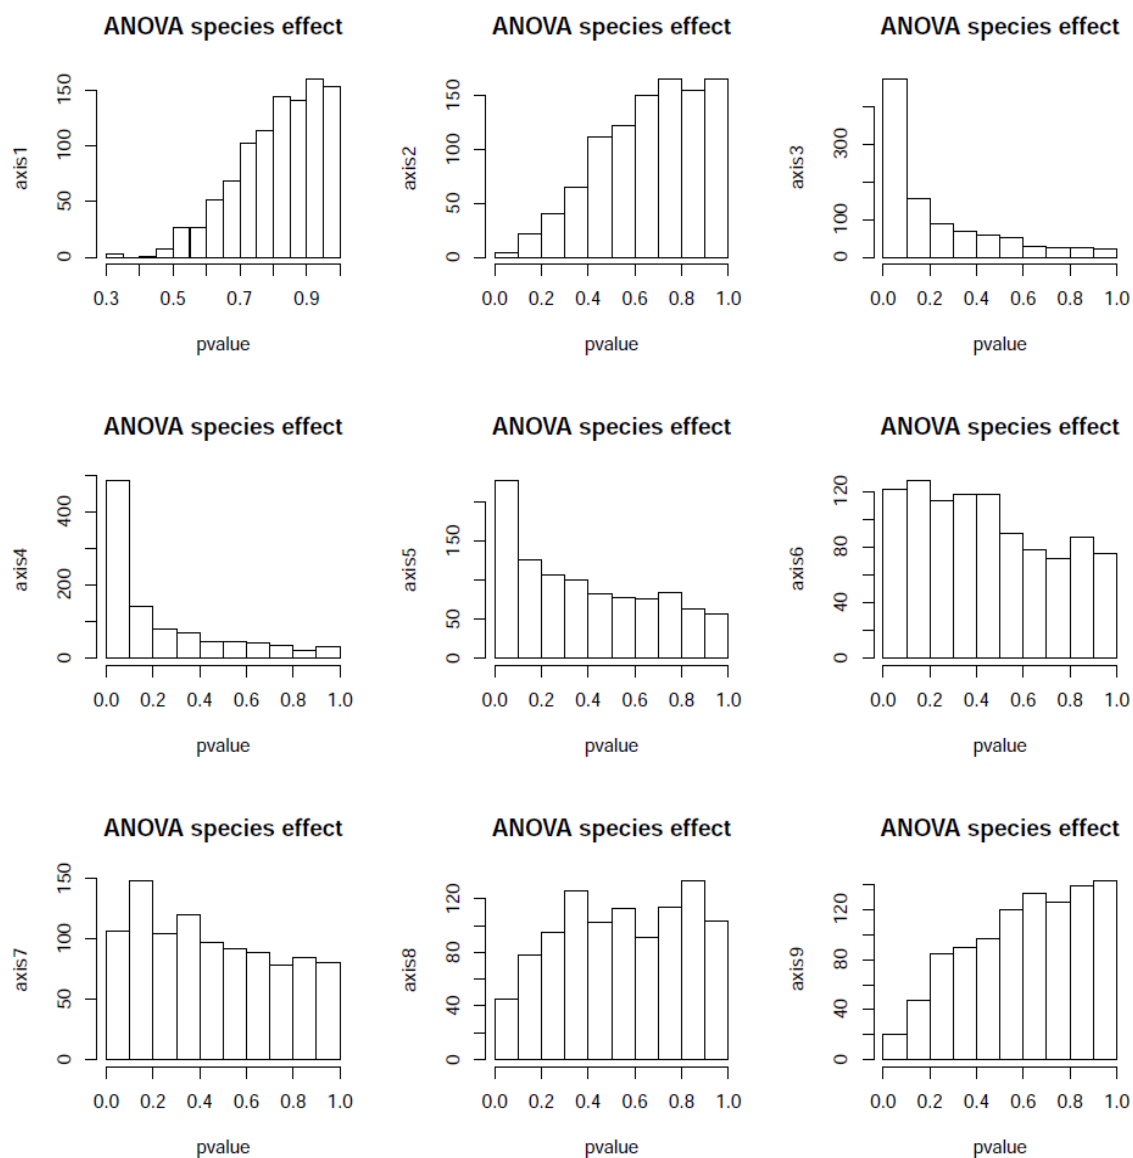

Figure S1

P-value distributions for ANOVAs testing the alternative hypothesis that microbial communities differ between wild caught *D. melanogaster* and *D. simulans* based on PCoA of Jaccard distances. If there was no species effect on microbial community composition p-values are expected to be uniformly distributed. PCos 1-9 are displayed. Axes 3, 4, and 5 are enriched for low p-values indicating a species effect.
