# Supplementary material for: Host Species and Environmental Effects on Bacterial Communities Associated with Drosophila in the Laboratory and in the Natural Environment
Source: PLOS journal article supplement (doi:10.1371/journal.pone.0070749), 2013-08-13
Supplement: S3 (10.1371/journal.pone.0070749.s003) [file journal.pone.0070749.s003]

| Distance method  | OTU threshold | Pearson p-value | Spearman p-value |
|------------------|---------------|-----------------|------------------|
| Jaccard          | 97%           | 0.69            | 0.63             |
| Jaccard          | 95%           | 0.57            | 0.97             |
| Jaccard          | 90%           | 0.64            | 0.61             |
| Jaccard          | 80%           | 0.79            | 0.34             |
| Jaccard          | unique        | 0.39            | 0.50             |
| Bray-Curtis      | 97%           | 0.70            | 0.30             |
| Bray-Curtis      | 95%           | 0.83            | 0.37             |
| Bray-Curtis      | 90%           | 0.83            | 0.39             |
| Bray-Curtis      | 80%           | 0.97            | 0.24             |
| Bray-Curtis      | unique        | 0.09            | 0.17             |
| Morisita-Horn    | 97%           | 0.66            | 0.30             |
| Morisita-Horn    | 95%           | 0.64            | 0.39             |
| Morisita-Horn    | 90%           | 0.64            | 0.39             |
| Morisita-Horn    | 80%           | 0.79            | 0.26             |
| Morisita-Horn    | unique        | 0.07            | 0.23             |
| ThetaYC          | 97%           | 0.77            | 0.30             |
| ThetaYC          | 95%           | 0.64            | 0.39             |
| ThetaYC          | 90%           | 0.64            | 0.39             |
| ThetaYC          | 80%           | 0.81            | 0.26             |
| ThetaYC          | unique        | 0.07            | 0.23             |
| Unifrac          | na            | 0.45            | 0.15             |
| Weighted Unifrac | na            | 0.33            | 0.15             |

#### Supplementary table 2

Non-significance of a correlation between bacterial community distances and genetic distances for the nine lab-reared *Drosophila* species obtained from the UCSD Stock Center. The genetic distances between the nine *Drosophila* species were calculated genome wide using 4-fold degenerate sites. We tested for correlation of the genetic distances with different community distance measures at different OTU identity cutoffs. P-values based on Pearson's correlation coefficient and Spearman's rho are shown.
