# Supplementary material for: Host Species and Environmental Effects on Bacterial Communities Associated with Drosophila in the Laboratory and in the Natural Environment
Source: PLoS One. 2013 Aug 13;8(8):e70749. doi: 10.1371/journal.pone.0070749 (PMC3742674; doi:10.1371/journal.pone.0070749)
Supplement: Table S3 — 100 most abundant OTUs. The table provides a representative sequence for each OTU, SILVA based taxonomy, and the relative abundance for of each OTU in individual samples (columns with sample names). (XLS) [file pone.0070749.s004.xls]

## Sheet: Sheet2
OTU ID #	total # of sequences in OTU	representative sequence	sequence ID	SILVA taxonomy	average relative abundance across all samples	m.ora1	s.ora1	m.ora2	s.ora2	m.ora3	s.ora3	m.str	s.str	m.app	s.app	m.pea	s.pea	m.com	s.com	m.pet1	m.pet2	m.pet3	m.pet4	m.pet5	m.pet6	s.pet1	s.pet2	s.pet3	s.pet4	s.pet5	m.pet1_l	m.pet2_l	m.pet3_l	m.pet4_l	m.pet5_l	m.pet6_l	s.pet1_l	s.pet2_l	s.pet3_l	s.pet4_l	s.pet5_l	m.	s.	sech	yak	erec	pers	pseu	vir
26	57418	AGCGAACGCTGGCGGCATGCTTAACACATGCAAGTCGCACGAAGGTTTCGGCCTTAGTGGCGGACGGGTGAGTAACGCGTAGGAATCTATCCATGGGTGGGGGATAACTCTGGGAAACTGGAGCTAATACCGCATGACACCTGAGGGTCAAAGGCGCAAGTCGCCTGTGGAGGAGCCTGCGTTTGATTAGCTTGTTGGTGGGGTAATGGCCTACCAAGGCGATGATCAATAGCTGGTCTGAGAGGATGATCAGCCACACTGGGACTGAGACACGGCCCAG	HDPIR2003FJUTD	Bacteria(100);Proteobacteria(100);Alphaproteobacteria(100);Rhodospirillales(100);Acetobacteraceae(100);Acetobacter(100);unclassified;unclassified;unclassified;	0.222809	0.00828853	0.0317982	0.0234032	0.0131715	0.0184022	0.00545852	0.366722	0.399447	0.10646	0.171959	0.212788	0.251389	0.191715	0.12083	0	0	0	0	0	0.113537	0	0	0.00100806	0.00189322	0	0.00608899	0	0	0	0	0	0	0	0	0	0	0.890537	0.958128	0.527879	0.866937	0.0462337	0.0774908	0.92654	0.407651
28	41949	GACGAACGCTGGCGGCATGCCTAATACATGCAAGTCGAACGAGCTGCGCCTAATGATAGTTGATGCTTGCATTAACTTGACTTAAGTTAGCAGCGAGTGGCGAACTGGTGAGTAACACGTGGATAACCTGCCCAGAAGAAGGGGATAACACCTGGAAACAGATGCTAATACCGTATAACAACGAAAACCACATGGTTTTCGTTTGAAAGATGGCCTTTGTGCTATCGCTTTTGGATGGATCCGCGGCGCATTAGCTAGTTGGTGAGATAAAGGCTCACCAAGGCAATGATGCGTAGCCGACCTGAGAGGGTAATCGGCCACATTGGGACTGAGACACGGCCCAG	G4S51TB02ELFZ1	Bacteria(100);Firmicutes(98);Bacilli(97);Lactobacillales(95);Lactobacillaceae(93);Lactobacillus(63);unclassified;unclassified;unclassified;	0.240961	0	0	0	0	0.000224417	0	0	0	0	0	0	0	0	0.000406835	0	0.911612	0.415352	0.969589	0.992273	0.00436681	0.0172414	0.936	0.00201613	0.939417	0.950192	0	0.99863	0.534043	0.709069	0.999071	0	0.989051	0.994045	0	0.652643	0.996656	0	0	0	0	0	0	0	0
38	32007	AGCGAACGCTGGCGGCATGCTTAACACATGCAAGTCGCACGAAGGTTTCGGCCTTAGTGGCGGACGGGTGAGTAACGCGTAGGTATCTATCCATGGGTGGGGGATAACACTGGGAAACTGGTGCTAATACCGCATGACACCTGAGGGTCAAAGGCGTAAGTCGCCTGTGGAGGAGCCTGCGTTTGATTAGCTAGTTGGTGGGGTAAAGGCCTACCAAGGCGATGATCAATAGCTGGTTTGAGAGGATGATCAGCCACACTGGGACTGAGACACGGCCCAG	G4S51TB02EACBB	Bacteria(100);Proteobacteria(100);Alphaproteobacteria(100);Rhodospirillales(100);Acetobacteraceae(100);Acetobacter(100);unclassified;unclassified;unclassified;	0.104094	0	0	0.000243784	0	0.000448833	0	0.0179092	0.00276571	0.000301159	0.00216029	0.000147667	0.0006413	0.0308019	0.00488202	0	0	0	0	0	0.0131004	0	0	0	0	0	0	0	0	0.00392157	0	0	0	0	0.999302	0	0	0.0150659	0.00492611	0.000989772	0	0.664534	0.000246002	0	0.218877
25	17936	AGCGAACGCTGGCGGCATGCTTAACACATGCAAGTCGCACGAAGGTTTCGGCCTTAGTGGCGGACGGGTGAGTAACGCGTAGGGATCTATCCACGGGTGGGGGACAACTTCGGGAAACTGGAGCTAATACCGCATGATACCTGAGGGTCAAAGGCGCAAGTCGCCTGTGGAGGAACCTGCGTTCGATTAGCTAGTTGGTGGGGTAAAGGCCTACCAAGGCGATGATCGATAGCTGGTTTGAGAGGATGATCAGCCACACTGGGACTGAGACACGGCCCAG	G4S51TB02D4J6Y	Bacteria(100);Proteobacteria(100);Alphaproteobacteria(100);Rhodospirillales(100);Acetobacteraceae(100);Gluconobacter(99);unclassified;unclassified;unclassified;	0.0899132	0.0174731	0.458333	0.496831	0.391012	0.536131	0.21179	0.142232	0.418807	0.19214	0.538345	0.375074	0.3587	0.330324	0.38812	0	0	0	0	0	0	0	0	0	0	0	0	0	0	0	0	0	0	0	0	0	0	0	0	0	0	0	0	0	0
22	15354	GACGAACGCTGGCGGCGTGCCTAATACATGCAAGTCGAACGAACTCTGGTATTGATTGGTGCTTGCATCATGATTTACATTTGAGTGAGTGGCGAACTGGTGAGTAACACGTGGGAAACCTGCCCAGAAGCGGGGGATAACACCTGGAAACAGATGCTAATACCGCATAACAACTTGGACCGCATGGTCCGAGTTTGAAAGATGGCTTCGGCTATCACTTTTGGATGGTCCCGCGGCGTATTAGCTAGATGGTGGGGTAACGGCTCACCATGGCAATGATACGTAGCCGACCTGAGAGGGTAATCGGCCACATTGGGACTGAGACACGGCCCAA	HDPIR2003G8QOM	Bacteria(100);Firmicutes(100);Bacilli(100);Lactobacillales(100);Lactobacillaceae(100);Lactobacillus(100);unclassified;unclassified;unclassified;	0.065135	0	0	0.00901999	0.000774793	0	0	0	0	0	0	0.000443001	0	0.0265534	0.0146461	0	0	0	0	0	0	0	0	0	0	0	0.988759	0	0.41117	0	0	0	0	0	0	0	0	0.0282486	0.0197044	0.138898	0.11349	0.226461	0.590898	0.0642521	0.0321412
35	10747	GACGAACGCTGGCGGCATGCCTAATACATGCAAGTCGAACGAGCTTCCGTTGAATGACGTGCTTGCACTGATTTCAACAATGAAGCGAGTGGCGAACTGGTGAGTAACACGTGGGAAATCTGCCCAGAAGCAGGGGATAACACTTGGAAACAGGTGCTAATACCGTATAACAACAAAATCCGCATGGATTTTGTTTGAAAGGTGGCTTCGGCTATCACTTCTGGATGATCCCGCGGCGTATTAGTTAGTTGGTGAGGTAAAGGCCCACCAAGACGATGATACGTAGCCGACCTGAGAGGGTAATCGGCCACATTGGGACTGAGACACGGCCCAA	G4S51TB02EC6AA	Bacteria(100);Firmicutes(100);Bacilli(100);Lactobacillales(100);Lactobacillaceae(100);Lactobacillus(100);unclassified;unclassified;unclassified;	0.0355113	0	0	0	0	0	0	0	0	0	0	0	0	0.00371747	0.0012205	0.113221	0.0225303	0	0	0	0.231441	0	0	0	0	0	0.000468384	0	0	0	0	0.992269	0	0	0	0	0	0.00776836	0	0.0224348	0.000867804	0.0162965	0.0130381	0.00716186	0.334314
68	7289	GATGAACGCTGGCGGCGTGCCTAATACATGCAAGTCGAACGCACAGCGAAAGGTGCTTGCACCTTTCAAGTGAGTGGCGAACGGGTGAGTAACACGTGGACAACCTGCCTCAAGGCTGGGGATAACATTTGGAAACAGATGCTAATACCGAATAAAACTCAGTGTCGCATGACACAAAGTTAAAAGGCGCTTTGGCGTCACCTAGAGATGGATCCGCGGTGCATTAGTTAGTTGGTGGGGTAAAGGCCTACCAAGACAATGATGCATAGCCGAGTTGAGAGACTGATCGGCCACATTGGGACTGAGACACGGCCCAA	G4S51TB02DQN1Q	Bacteria(100);Firmicutes(100);Bacilli(100);Lactobacillales(100);Leuconostocaceae(100);Leuconostoc(100);unclassified;unclassified;unclassified;	0.0603533	0.016353	0.0175439	0.00268162	0.000774793	0.00067325	0.00218341	0.00145773	0	0.00165638	0	0.0178677	0.0239419	0.0387679	0.0146461	0.875457	0.0017331	0.45792	0	0	0.0742358	0.844828	0	0.814516	0.000757289	0	0	0	0	0	0	0	0	0	0	0	0	0.0510829	0	0	0	0	0	0	0
29	4698	AGCGAACGCTGGCGGCATGCTTAACACATGCAAGTCGCACGAAGGCTTCGGCCTTAGTGGCGGACGGGTGAGTAACGCGTAGGAATCTATCCATGGGTGGGGGATAACATCGGGAAACTGGTGCTAATACCGCATGATACCTGAGGGTCAAAGGCGCAAGTCGCCTGTGGAGGAGCCTGCGTTCGATTAGCTAGTTGGTGGGGTAAAGGCCTACCAAGGCGATGATCGATAGCTGGTTTGAGAGGATGATCAGCCACACTGGGACTGAGACACGGCCCAG	GRM10JK03DL8PS	Bacteria(100);Proteobacteria(100);Alphaproteobacteria(100);Rhodospirillales(100);Acetobacteraceae(100);Acetobacter(84);unclassified;unclassified;unclassified;	0.0162736	0.0015681	0.0197368	0.00463189	0.0072314	0.0125673	0.0010917	0.014369	0.0225207	0.336395	0.136963	0.11769	0.129543	0.0212427	0.0528885	0	0	0	0	0	0	0	0	0	0	0	0	0	0	0	0	0	0	0	0	0	0	0	0	0	0	0	0	0	0
23	4493	AGCGAACGCTGGCGGCATGCTTAACACATGCAAGTCGCACGAACCTTTCGGGGTTAGTGGCGGACGGGTGAGTAACGCGTAGGAATCTGTCCACGGGTGGGGGATAACTCTGGGAAACTGGAGCTAATACCGCATGATACCTGAGGGTCAAAGGCGCAAGTCGCCTGTGGAGGAGCCTGCGTTCGATTAGCTAGTTGGTGGGGTAAAGGCCTACCAAGGCGATGATCGATAGCTGGTTTGAGAGGATGATCAGCCACACTGGGACTGAGACACGGCCCAG	G4S51TB02C15IV	Bacteria(100);Proteobacteria(100);Alphaproteobacteria(100);Rhodospirillales(100);Acetobacteraceae(100);Acetobacter(76);unclassified;unclassified;unclassified;	0.017116	0	0	0.000731351	0.000774793	0	0	0.0508122	0.0529435	0.222858	0.080579	0.182221	0.109021	0.0685077	0.155818	0	0	0	0	0	0	0	0	0	0	0	0	0	0	0	0	0	0	0	0	0	0	0	0	0	0	0	0	0	0
60	3672	GACGAACGCTGGCGGCGTGCCTAATACATGCAAGTCGAACGCTTCTTTCCTATCGAGTGCTTGCACTCACTTGGGAAGAGGAGTGGCGGACGGGTGAGTAACACGTGGGTAACCTGCCCATCAGAGGGGGATAACACTTGGAAACAGGTGCTAATACCGCATAACAGCCAACACCGCATGGTGTTGGAATGAAAGACGCTTTCGGGTGTCACTGATGGATGGACCCGCGGTGCATTAGCTAGTTGGTGAGGTAACGGCTCACCAAGGCAATGATGCATAGCCGACCTGAGAGGGTGATCGGCCACACTGGGACTGAGACACGGCCCAG	G4S51TB02EFFIW	Bacteria(100);Firmicutes(100);Bacilli(100);Lactobacillales(100);Enterococcaceae(84);Enterococcus(78);unclassified;unclassified;unclassified;	0.0152975	0.803763	0.00219298	0.0043881	0	0	0	0.000832986	0	0.00015058	0.000216029	0	0.000213767	0.000531067	0	0	0	0	0	0	0	0	0	0	0	0	0	0	0	0	0	0	0	0	0	0	0	0	0	0	0	0	0.0137761	0	0
31	1964	ATTGAACGCTGGCGGCAGGCCTAACACATGCAAGTCGAGCGGTAACACAGGAAGCTTGCTTCCGGGTGACGAGCGGCGGACGGGTGAGTAATGTCTGGGAAACTGCCTGATGGAGGGGGATAACTACTGGAAACGGTAGCTAATACCGCATAATGTCGCAAGACCAAAGAGGGGGACCTTCGGGCCTCTTGCCATCGGATGTGCCCAGATGGGATTAGCTAGTAGGTGAGGTAATGGCTCACCTAGGCGACGATCCCTAGCTGGTCTGAGAGGATGACCAGCCACACTGGAACTGAGACACGGTCCAG	G4S51TB02D2CTN	Bacteria(100);Proteobacteria(100);Gammaproteobacteria(100);Enterobacteriales(100);Enterobacteriaceae(100);Enteric_Bacteria_cluster(100);Pectobacterium(80);unclassified;unclassified;	0.0093339	0.00112007	0	0.0526572	0.449638	0	0	0.000208247	0	0	0	0	0	0	0.000406835	0	0	0	0	0	0	0	0	0	0	0	0	0	0	0	0	0	0	0	0	0	0	0	0	0	0	0	0	0	0
24	1557	ATTGAACGCTGGCGGCAGGCCTAACACATGCAAGTCGAGCGGTAGCACGGGAGAGCTTGCTCTCTGGGTGACGAGCGGCGGACGGGTGAGTAATGTCTGGGAAACTGCCTGATGGAGGGGGATAACTACTGGAAACGGTAGCTAATACCGCATGATGTCGCAAGACCAAAGTGGGGGACCTTCGGGCCTCACGCCATCGGATGTGCCCAGATGGGATTAGCTAGTAGGTGGGGTAATGGCTCACCTAGGCGACGATCCCTAGCTGGTCTGAGAGGATGACCAGCCACACTGGAACTGAGACACGGTCCAG	G4S51TB02DLMZ9	Bacteria(100);Proteobacteria(100);Gammaproteobacteria(100);Enterobacteriales(100);Enterobacteriaceae(100);Enteric_Bacteria_cluster(100);Serratia(86);unclassified;unclassified;	0.0100528	0.0369624	0	0.277426	0.0131715	0.000448833	0.213974	0	0	0	0	0.000443001	0.000427533	0	0	0	0	0	0	0	0	0	0	0	0	0	0	0	0	0	0	0	0	0	0	0	0	0	0	0	0	0	0	0	0
20	1409	AGTGAACGCTGGCGGCATGCTTAACACATGCAAGTCGCACGGATGCTTCGGCATTAGTGGCGGACGGGTGAGTAACGCGTAGGGATCTATCCACGAGTGGGGGATAACTTTGGGAAACTGAAGCTAATACCGCATGATACCTGAGGGTCAAAGGAGTGATCCGCTTGTGGAGGAACCTGCGTTTGATTAGCTAGTTGGTGGGGTAAAGGCCTACCAAGGCGATGATCAATAGCTGGTTTGAGAGGATGATCAGCCACACTGGGACTGAGACACGGCCCAG	GRM10JK03C68N9	Bacteria(100);Proteobacteria(99);Alphaproteobacteria(99);Rhodospirillales(99);Acetobacteraceae(99);Gluconobacter(27);unclassified;unclassified;unclassified;	0.0111181	0.00448029	0.321272	0.0104827	0.00542355	0.115126	0.00327511	0.0566431	0.0015804	0.0120464	0.00151221	0.00103367	0.00149637	0.047265	0.0162734	0	0	0	0	0	0	0	0	0	0	0	0	0	0	0	0	0	0	0	0	0	0	0	0	0	0	0	0.00221402	0	0
75	1298	GATGAACGCTGGCGGCATGCTTAACACATGCAAGTCGAACGGGAAGTGGTGTTTCCAGTGGCGAACGGGTGAGTAACGCGTAAGAACCTGCCCTTGGGAGGGGAACAACAACTGGAAACGGTTGCTAATACCCCGTAGGCTGAGGAGCAAAAGGAGAAATCCGCCCAAGGAGGGGCTCGCGTCTGATTAGCTAGTTGGTGAGGCAATAGCTTACCAAGGCGATGATCAGTAGCTGGTCCGAGAGGATGATCAGCCACACTGGGACTGAGACACGGCCCAG	HDPIR2003G4ZY1	Bacteria(100);Cyanobacteria(100);Chloroplast(100);unclassified;unclassified;unclassified;unclassified;unclassified;unclassified;	0.0104698	0.00851254	0.00438596	0.000487567	0.000258264	0.000448833	0	0.00166597	0.0434611	0	0	0.000295334	0.000855066	0.00212427	0.000406835	0	0	0	0	0	0.161572	0	0	0.00201613	0.00454373	0	0	0	0.0037234	0.230392	0	0.000253485	0.00729927	0.000626861	0.000523469	0.0809061	0.00167224	0	0	0	0.000192845	0.000362144	0	0.000204625	0
80	1263	ATTGAACGCTGGCGGCAGGCCTAACACATGCAAGTCGAGCGGTAACAGGGGAAGCTTGCTTCTCGCTGACGAGCGGCGGACGGGTGAGTAATGTATGGGGATCTGCCCGATAGAGGGGGATAACTACTGGAAACGGTAGCTAATACCGCATAATCTCTAAGGAGCAAAGCAGGGGAACTTCGGTCCTTGCGCTATCGGATGAACCCATATGGGATTAGCTAGTTGGTGAGGTAATGGCTCACCAAGGCGACGATCCCTAGCTGGTCTGAGAGGATGATCAGCCACACTGGGACTGAGACACGGCCCAG	G4S51TB02C9TM6	Bacteria(100);Proteobacteria(100);Gammaproteobacteria(100);Enterobacteriales(100);Enterobacteriaceae(100);Providencia(100);unclassified;unclassified;unclassified;	0.00487029	0	0	0	0	0	0	0.262599	0	0.00015058	0	0	0	0	0	0	0	0	0	0	0	0	0	0	0	0	0	0	0	0	0	0	0	0	0	0	0	0	0	0	0	0	0.000246002	0	0
39	812	GACGAACGCTGGCGGCGTGCTTAACACATGCAAGTCGAACGGAAAGGCCCTGCTTGCAGGGTACTCGAGTGGCGAACGGGTGAGTAACACGTGGGTGATCTGCCCTGCACTTCGGGATAAGCCTGGGAAACTGGGTCTAATACCGGATAGGACCATCGTTTAGTGTCGGTGGTGGAAAGTTTTTCGGTGCAGGATGAGCTCGCGGCCTATCAGCTTGTTGGTGGGGTAATGGCCTACCAAGGCGTCGACGGGTAGCCGGCCTGAGAGGGTGGACGGCCACATTGGGACTGAGACACGGCCCAG	GRM10JK03DAIPM	Bacteria(100);Actinobacteria(100);Actinobacteria(100);Actinobacteridae(100);Actinomycetales(100);Corynebacterineae(100);Corynebacteriaceae(100);Corynebacterium(100);unclassified;	0.00493432	0	0.0153509	0	0.00413223	0.000448833	0	0.000208247	0	0	0	0	0	0.0775358	0.0219691	0	0	0	0	0	0.00436681	0	0	0	0	0	0	0	0	0	0	0	0	0	0	0	0	0	0	0.000989772	0	0	0.141451	0	0
32	742	ATTGAACGCTGGCGGCAGGCCTAACACATGCAAGTCGAGCGGTAGAGAGAAGCTTGCTTCTCTTGAGAGCGGCGGACGGGTGAGTAATGCCTAGGAATCTGCCTGGTAGTGGGGGATAACGTTCGGAAACGGACGCTAATACCGCATACGTCCTACGGGAGAAAGCAGGGGACCTTCGGGCCTTGCGCTATCAGATGAGCCTAGGTCGGATTAGCTAGTTGGTGGGGTAATGGCTCACCAAGGCGACGATCCGTAACTGGTCTGAGAGGATGATCAGTCACACTGGAACTGAGACACGGTCCAG	G4S51TB02ETVMH	Bacteria(100);Proteobacteria(100);Gammaproteobacteria(100);Pseudomonadales(100);Pseudomonadaceae(100);Pseudomonas(100);unclassified;unclassified;unclassified;	0.0036311	0.00918459	0.00438596	0.0129205	0.00309917	0.134425	0.029476	0.000208247	0	0	0	0	0	0	0	0	0	0	0	0	0	0	0	0.00100806	0.00113593	0	0	0	0	0	0	0	0	0	0	0	0	0.000235405	0	0	0	0	0	0	0
71	727	ATTGAACGCTGGCGGCAGGCCTAACACATGCAAGTCGGGCGGTAACAGGGAGAAGCTTGCTTCTCTGCTGACGAGCGGCGGACGGGTGAGTAATGTATGGGGATCTGCCTGATGGCGGGGGATAACTACTGGAAACGGTAGCTAATACCGCATAATGTCTACGGACCAAAGCGGGGGACCTCCGGGCCTCGCGCCATCAGATGAACCCATATGGGATTAGCTTGTAGGTGAGGTAACGGCTCACCTAGGCGACGATCCCTAGCTGGTCTGAGAGGATGATCAGCCACACTGGGACTGAGACACGGCCCAG	G4S51TB02DCRBL	Bacteria(100);Proteobacteria(100);Gammaproteobacteria(100);Enterobacteriales(100);Enterobacteriaceae(100);Morganella(100);unclassified;unclassified;unclassified;	0.00439235	0	0	0	0	0	0	0	0	0	0	0	0	0	0	0	0	0	0	0	0	0	0	0	0	0	0	0	0	0	0	0	0	0	0	0	0	0	0	0.229297	0	0	0.00713407	0	0
47	648	GATGAACGCTGGCGGCGTGCCTAATACATGCAAGTCGAACGCTTTGTGGTCCAACTGATTTGAAGAGCTTGCTCAGATATGACGATGGACATTGCAAAGAGTGGCGAACGGGTGAGTAACACGTGGGAAACCTACCTCTTAGCAGGGGATAACACTTGGAAACAAGTGCTAATACCGTATAACACTAATAACCGCATGGTTATTAGTTAAAAGATGGTCTTGCTATCACTAAGAGATGGTCCCGCGTTGTATTAGCTAGTTGGTAAGGTAATGGCTTACCAAGGCAATGATACATAGCCGAGTTGAGAGACTGATCGGCCACAATGGGACTGAGACACGGCCCAT	GRM10JK03CW4NN	Bacteria(100);Firmicutes(100);Bacilli(100);Lactobacillales(100);Leuconostocaceae(100);Weissella(100);unclassified;unclassified;unclassified;	0.00167637	0.000224014	0	0	0	0	0	0	0	0	0	0	0	0	0	0	0	0.0903001	0	0	0	0	0	0	0	0	0	0	0	0	0	0	0	0	0	0	0	0	0	0	0	0	0	0	0
45	633	AGCGAACGCTGGCGGCATGCTTAACACATGCAAGTCGCACGAGGGTTTCGGCCCTAGTGGCGGACGGGTGAGTAACGCGTAGGTATCTATCCATGGGTGGGGGATAACTTTGGGAAACTGGAGCTAATACCGCATGACACCTGAGGGTCAAAGGCGCGAGTCGCCTGTGGAGGAGCCTGCGTTCGATTAGCTAGTTGGTGGGGTAAAGGCCTACCAAGGCGATGATCGATAGCTGGTTTGAGAGGATGATCAGCCACACTGGGACTGAGACACGGCCCAG	G4S51TB02EA0KX	Bacteria(100);Proteobacteria(100);Alphaproteobacteria(100);Rhodospirillales(100);Acetobacteraceae(100);Gluconacetobacter(44);unclassified;unclassified;unclassified;	0.00195831	0	0	0.000243784	0	0	0	0.00104123	0.000395101	0.0740852	0.0172824	0.00428234	0.00235143	0.0031864	0.00244101	0	0	0	0	0	0	0	0	0	0	0	0	0	0	0	0	0	0	0	0	0	0	0.000235405	0	0	0	0	0	0.000204625	0
149	626	ATTGAACGCTGGCGGCATGCTTTACACATGCAAGTCGAACGGCAGCGAGAGAGAGCTTGCTCTCTTGTCGGCGAGTGGCGAACGGGTGAGTAATGCATCGGAACGTGCCGAGTAATGGGGGATAACCGTCCGAAAGGATGGCTAATACCGCATACGCTCCAAGGAGGAAAGCGGGGGACCTTAGGGCCTCGCGTTATTCGAGCGGCCGATGTCGGATTAGCTAGTTGGTGGGGTAAGAGCCTACCAAGGCAATGATCCGTAGTGGGTCTGAGAGGATGATCCGCCACACTGGGACTGAGACACGGCCCAG	G4S51TB02EE7PH	Bacteria(100);Proteobacteria(100);Betaproteobacteria(100);Rhodocyclales(30);Rhodocyclaceae(30);Denitratisoma(27);unclassified;unclassified;unclassified;	0.00260157	0	0	0	0	0.140485	0	0	0	0	0	0	0	0	0	0	0	0	0	0	0	0	0	0	0	0	0	0	0	0	0	0	0	0	0	0	0	0	0	0	0	0	0	0	0
59	562	ATTGAACGCTGGCGGTATGCTTAACACATGCAAGTCGAACGGCAGCACAGCAGAGCTTGCTCTGTGGGTGGCGAGTGGCGGACGGGTGAGTAATACATCGGGACCTACCCAGACGTGGGGGATAACGTAGGGAAACTTACGCTAATACCGCATACGTCCTACGGGAGAAAGCAGGGGATCTTCGGACCTTGCGCGGTTGGACGGACCGATGTTCGATTAGCTTGTTGGTGAGGTAATGGCTCACCAAGGCGACGATCGATAGCTGGTCTGAGAGGATGATCAGCCACACTGGGACTGAGACACGGCCCAG	G4S51TB02EJ073	Bacteria(100);Proteobacteria(100);Gammaproteobacteria(100);Xanthomonadales(100);Xanthomonadaceae(100);Frateuria(100);unclassified;unclassified;unclassified;	0.00195745	0	0	0.00268162	0	0	0	0	0	0.0123475	0.0250594	0.029238	0.0307824	0.00477961	0.00081367	0	0	0	0	0	0	0	0	0	0	0	0	0	0	0	0	0	0	0	0	0	0	0	0	0	0	0	0	0	0
96	477	GACGAACGCTGGCGGCGTGCCTAATACATGCAAGTCGAACGCTTCTTTCCTGCCGAGTGCTTGCACTCACTTGGAAAGAGGAGTGGCGGACGGGTGAGTAACACGTGGGTAACCTGCCCATCAGAGGGGGATAACACTTGGAAACAGGTGCTAATACCGCATAATAGTCGACACCGCATGGTGTTGATTTGAAAGACGCTTTCGGGTGTCACTGATGGATGGACCCGCGGTGCATTAGCTAGTTGGTGAGGTAACGGCTCACCAAGGCCATGATGCATAGCCGACCTGAGAGGGTGATCGGCCACACTGGGACTGAGACACGGCCCAG	G4S51TB02D82XA	Bacteria(100);Firmicutes(100);Bacilli(100);Lactobacillales(100);Enterococcaceae(100);Enterococcus(100);unclassified;unclassified;unclassified;	0.00216752	0.000224014	0	0	0	0	0	0	0	0.000301159	0.000648088	0	0	0	0	0	0	0	0	0	0	0	0	0	0	0	0	0	0	0	0	0	0	0	0	0	0	0	0	0	0	0	0.115621	0	0
117	399	ATTGAACGCTGGCGGCAGGCCTAACACATGCAAGTCGAGCGGATGAGAAGAGCTTGCTCTTCGATTCAGCGGCGGACGGGTGAGTAATGCCTAGGAATCTGCCTGGTAGTGGGGGACAACGTTTCGAAAGGAACGCTAATACCGCATACGTCCTACGGGAGAAAGCAGGGGACCTTCGGGCCTTGCGCTATCAGATGAGCCTAGGTCGGATTAGCTAGTTGGTGAGGTAATGGCTCACCAAGGCGACGATCCGTAACTGGTCTGAGAGGATGATCAGTCACACTGGAACTGAGATACGGTCCAG	G4S51TB02DIVLK	Bacteria(100);Proteobacteria(100);Gammaproteobacteria(100);Pseudomonadales(100);Pseudomonadaceae(100);Pseudomonas(100);unclassified;unclassified;unclassified;	0.0080313	0	0.00219298	0	0	0	0.431223	0	0	0	0	0.000147667	0	0	0	0	0	0	0	0	0	0	0	0	0	0	0	0	0	0	0	0.000126743	0	0	0	0	0	0	0	0	0	0	0	0	0
252	345	ATTGAACGCTGGCGGCATGCCTTACACATGCAAGTCGAACGGCAGCATAGGAGCTTGCTCCTGATGGCGAGTGGCGAACGGGTGAGTAATATATCGGAACGTGCCCTAGAGTGGGGGATAACTAGTCGAAAGACTAGCTAATACCGCATACGATCTACGGATGAAAGTGGGGGATCGCAAGACCTCATGCTCCTGGAGCGGCCGATATCTGATTAGCTAGTTGGTGGGGTAAAAGCCTACCAAGGCAACGATCAGTAGCTGGTCTGAGAGGACGACCAGCCACACTGGGACTGAGACACGGCCCAG	HDPIR2003F5O5E	Bacteria(100);Proteobacteria(100);Betaproteobacteria(100);Burkholderiales(100);Oxalobacteraceae(100);Herbaspirillum(100);unclassified;unclassified;unclassified;	0.00429845	0	0	0	0	0	0	0.000208247	0	0	0	0	0	0	0	0.00219138	0	0.00125611	0.000475172	0.00171703	0.00873362	0	0	0	0	0	0	0	0	0.00465686	0	0	0	0.000156715	0	0.18986	0	0	0	0.012867	0.000289268	0.00893288	0	0	0
30	310	ATTGAACGCTGGCGGCAGGCCTAACACATGCAAGTCGAACGGTAGCACAGAGGAGCTTGCTCCTTGGGTGACGAGTGGCGGACGGGTGAGTAATGTCTGGGAAACTGCCTGATGGAGGGGGATAACTACTGGAAACGGTAGCTAATACCGCATAACGTCTTCGGACCAAAGTGGGGGACCTTAGGGCCTCACACCATCGGATGTGCCCAGATGGGATTAGCTAGTAGGTGGGGTAATGGCTCACCTAGGCGACGATCCCTAGCTGGTCTGAGAGGATGACCAGCCACACTGGAACTGAGACACGGTCCAG	G4S51TB02EK4SO	Bacteria(100);Proteobacteria(100);Gammaproteobacteria(100);Enterobacteriales(100);Enterobacteriaceae(100);Enteric_Bacteria_cluster(100);Erwinia(89);unclassified;unclassified;	0.00158377	0.03069	0	0.0173086	0	0	0.0229258	0.000208247	0	0	0	0.00605434	0.0083369	0	0	0	0	0	0	0	0	0	0	0	0	0	0	0	0	0	0	0	0	0	0	0	0	0	0	0	0	0	0	0	0
33	274	ATTGAACGCTGGCGGCAGGCCTAACACATGCAAGTCGAACGGTAGCACAGAGGAGCTTGCTCCTTGGGTGACGAGTGGCGGACGGGTGAGTAATGTCTGGGAAACTGCCTGATGGAGGGGGATAACTACTGGAAACGGTAGCTAATACCGCATAATGTCGCAAGACCAAAGCGGGGGACCTTCGGGCCTCGCACCATCGGATGTGCCCAGATGGGATTAGCTAGTAGGTGGGGTAATGGCTCACCTAGGCGACGATCCCTAGCTGGTCTGAGAGGATGACCAGCCACACTGGAACTGAGACACGGTCCAG	GRM10JK03C84UX	Bacteria(100);Proteobacteria(100);Gammaproteobacteria(100);Enterobacteriales(100);Enterobacteriaceae(100);Enteric_Bacteria_cluster(98);Pectobacterium(60);unclassified;unclassified;	0.00151807	0.0170251	0	0.00390054	0	0	0.0141921	0.0106206	0.00750691	0.00286101	0.00108015	0.00280567	0.00171013	0.0031864	0.0170871	0	0	0	0	0	0	0	0	0	0	0	0	0	0	0	0	0	0	0	0	0	0	0	0	0	0	0	0	0	0
73	262	ATTGAACGCTGGCGGCAGGCCTAACACATGCAAGTCGAACGGTAGCACAGGGGAGCTTGCTCCCCGGGTGACGAGTGGCGGACGGGTGAGTAATGTCTGGGAAACTGCCTGATGGAGGGGGATAACTACTGGAAACGGTAGCTAATACCGCATAATGTCGCAAGACCAAAGCGGGGGACCTTCGGGCCTCGCACCATCGGATGTGCCCAGATGGGATTAGCTAGTAGGTGGGGTAATGGCTCACCTAGGCGACGATCCCTAGCTGGTCTGAGAGGATGACCAGCCACACTGGAACTGAGACACGGTCCAG	G4S51TB02DVZ6O	Bacteria(100);Proteobacteria(100);Gammaproteobacteria(100);Enterobacteriales(100);Enterobacteriaceae(100);Enteric_Bacteria_cluster(100);Erwinia(47);unclassified;unclassified;	0.00097648	0	0	0	0	0	0	0.0337359	0.0019755	0.00767957	0.000432059	0.000590667	0.00790936	0	0.000406835	0	0	0	0	0	0	0	0	0	0	0	0	0	0	0	0	0	0	0	0	0	0	0	0	0	0	0	0	0	0
58	235	ATTGAACGCTGGCGGCAGGCCTAACACATGCAAGTCGAGCGGCAGCGGGAAGTAGCTTGCTACTTTGCCGGCGAGCGGCGGACGGGTGAGTAATGTCTGGGAAACTGCCTGATGGAGGGGGATAACTACTGGAAACGGTAGCTAATACCGCATGACCTCGAAAGAGCAAAGTGGGGGACCTTCGGGCCTCACGCCATCGGATGTGCCCAGATGGGATTAGCTAGTAGGTGAGGTAATGGCTCACCTAGGCGACGATCCCTAGCTGGTCTGAGAGGATGACCAGCCACACTGGAACTGAGACACGGTCCAG	G4S51TB02DEP10	Bacteria(100);Proteobacteria(100);Gammaproteobacteria(100);Enterobacteriales(100);Enterobacteriaceae(100);Enteric_Bacteria_cluster(99);Brenneria(85);unclassified;unclassified;	0.00116474	0.0134409	0	0.0399805	0.000516529	0.000224417	0.00873362	0	0	0	0	0	0	0	0	0	0	0	0	0	0	0	0	0	0	0	0	0	0	0	0	0	0	0	0	0	0	0	0	0	0	0	0	0	0
27	223	GACGAACGCTGGCGGCGTGCCTAATACATGCAAGTCGAGCGAGCTGAATTCAAAGATCCCTTCGGGGTGATTTGTTGGACGCTAGCGGCGGATGGGTGAGTAACACGTGGGCAATCTGCCCTAAAGACTGGGATACCACTTGGAAACAGGTGCTAATACCGGATAACAACATGAATCGCATGATTCAAGTTTGAAAGGCGGCGCAAGCTGTCACTTTAGGATGAGCCCGCGGCGCATTAGCTAGTTGGTGGGGTAAAGGCCTACCAAGGCAATGATGCGTAGCCGAGTTGAGAGACTGATCGGCCACATTGGGACTGAGACACGGCCCAA	GRM10JK03DJSRG	Bacteria(100);Firmicutes(100);Bacilli(100);Lactobacillales(100);Lactobacillaceae(100);Lactobacillus(100);unclassified;unclassified;unclassified;	0.00195923	0	0	0	0	0.000224417	0	0.000208247	0	0	0.000216029	0	0.000427533	0.00212427	0.000406835	0	0	0.0068388	0.000950344	0	0.0436681	0.00862069	0	0	0.00492238	0	0	0	0.00744681	0.00343137	8.44167e-05	0.000126743	0	0.000783576	0	0.00970874	0	0	0	0.00659848	0.000771382	0.00736359	0	0	0
66	213	ATTGAACGCTGGCGGCAGGCTTAACACATGCAAGTCGAGCGGGGGATGTTGCTTCGGTAACTGACCTAGCGGCGGACGGGTGAGTAATACTTAGGAATCTGCCTATTAATGGGGGACAACATCTCGAAAGGGATGCTAATACCGCATACGCCCTACGGGGGAAAGCAGGGGATCACTTGTGACCTTGCGTTAATAGATGAGCCTAAGTCGGATTAGCTAGTTGGTGGGGTAAAGGCCTACCAAGGCGACGATCTGTAGCGGGTCTGAGAGGATGATCCGCCACACTGGGACTGAGACACGGCCCAG	HDPIR2003FQGNE	Bacteria(100);Proteobacteria(100);Gammaproteobacteria(100);Pseudomonadales(100);Moraxellaceae(100);Acinetobacter(100);unclassified;unclassified;unclassified;	0.00244057	0	0	0	0	0	0	0	0.000395101	0	0	0.000443001	0.0032065	0.00106213	0.00244101	0	0	0	0	0.00463599	0.00873362	0.0603448	0	0.00201613	0.000378644	0	0	0	0.00106383	0.000245098	0	0	0	0	0	0	0	0	0	0.012867	0.000192845	0.000241429	0	0	0
173	211	ATTGAACGCTGGCGGCATGCCTTACACATGCAAGTCGAACGGCAGCATGATCTAGCTTGCTAGATTGATGGCGAGTGGCGAACGGGTGAGTAATACATCGGAACGTGCCCTGTAGTGGGGGATAACTAGTCGAAAGATTAGCTAATACCGCATACGACCTGAGGGTGAAAGTGGGGGACCGCAAGGCCTCATGCTATAGGAGCGGCCGATGTCTGATTAGCTAGTTGGTGAGGTAAAGGCTCACCAAGGCGACGATCAGTAGCTGGTCTGAGAGGACGATCAGCCACACTGGGACTGAGACACGGCCCAG	HDPIR2003HADPP	Bacteria(100);Proteobacteria(100);Betaproteobacteria(100);Burkholderiales(100);Burkholderiaceae(100);Ralstonia(100);unclassified;unclassified;unclassified;	0.00231978	0	0	0	0.000258264	0	0	0.000416493	0	0	0	0	0	0.00212427	0.00081367	0.00073046	0.0017331	0.00153524	0.000712758	0	0.0436681	0	0	0.00302419	0.0140098	0.0114943	0.00140515	0	0.00425532	0.00931373	0.000168833	0.000506971	0	0	0	0.0161812	0	0.00047081	0.00123153	0.00230947	0.0012535	0.00241429	0.000246002	0	0
49	177	ATTGAACGCTGGCGGCAGGCTTAACACATGCAAGTCGAACGGTAACAGGGAGTAGCTTGCTACTTTGCTGACGAGTGGCGGACGGGTGAGTAAAGTATGGGAATTTGCCGAATGGAGGGGGACAACAGTTGGAAACGACTGCTAATACCGCATAAAGTCGCGAGACCAAAGGGTGGGACCTTCGGGCCACTTGCCATTTGATGAGCCCATATGAGATTAGCTAGTTGGTGAGGTAAGGGCTCACCAAGGCGACGATCTCTAGCTGGTTTGAGAGGATGACCAGCCACACTGGGACTGAGACACGGCCCAG	G4S51TB02C178E	Bacteria(100);Proteobacteria(99);Gammaproteobacteria(98);Pasteurellales(15);Pasteurellaceae(15);Phocoenobacter(14);unclassified;unclassified;unclassified;	0.000846032	0	0	0	0	0	0	0.00062474	0.0177795	0.000301159	0.00129618	0.00841701	0.0102608	0.00212427	0.00488202	0	0	0	0	0	0	0	0	0	0	0	0	0	0	0	0	0	0	0	0	0	0	0	0	0	0	0	0	0	0
74	157	ATTGAACGCTGGCGGCAGGCCTAACACATGCAAGTCGAGCGGTAACACAGGAAGCTTGCTTCCGGGTGACGAGCGGCGGACGGGTGAGTAATGTCTGGGAAACTGCCTGATGGAGGGGGATAACTACTGGAAACGGTAGCTAATACCGCATAACGTCGCAAGACCAAAGAGGGGGACCTTCGGGCCTCTTGCCATCGGATGTGCCCAGATGGGATTAGCTAGTAGGTGAGGTAATGGCTCACCTAGGCGACGATCCCTAGCTGGTCTGAGAGGATGACCAGCCACACTGGAACTGAGACACGGTCCAG	G4S51TB02EQTBZ	Bacteria(100);Proteobacteria(100);Gammaproteobacteria(100);Enterobacteriales(100);Enterobacteriaceae(100);Enteric_Bacteria_cluster(100);Pectobacterium(45);unclassified;unclassified;	0.000763048	0.00179211	0	0.00195027	0.0356405	0	0	0	0	0	0	0	0	0	0.00081367	0	0	0	0	0	0	0	0	0.00100806	0	0	0	0	0	0	0	0	0	0	0	0	0	0	0	0	0	0	0	0	0
107	152	GACGAACGCTGGCGGCGTGCTTAACACATGCAAGTCGAGCGGTAAGGCCTTTCGGGGTACACGAGCGGCGAACGGGTGAGTAACACGTGGGTGATCTGCCCTGCACTCTGGGATAAGCTTGGGAAACTGGGTCTAATACCGGATATGACCGCATGCCGCATGGTGTGTGGTGGAAAGATTTATCGGTGCAGGATGGGCCCGCGGCCTATCAGCTTGTTGGTGGGGTAATGGCCTACCAAGGCGACGACGGGTAGCCGACCTGAGAGGGTGACCGGCCACACTGGGACTGAGACACGGCCCAG	G4S51TB02DMKET	Bacteria(100);Actinobacteria(100);Actinobacteria(100);Actinobacteridae(100);Actinomycetales(100);Corynebacterineae(100);Nocardiaceae(100);Rhodococcus(97);unclassified;	0.000840877	0	0.00109649	0	0.0371901	0	0.0010917	0	0	0	0	0.000147667	0	0	0	0	0	0	0	0	0.00436681	0	0	0	0.00151458	0	0	0	0	0	0	0	0	0	0	0	0	0	0	0	0	0	0	0	0
206	99	GATGAACGCTAGCTACAGGCTTAACACATGCAAGTCGAGGGGCAGCATGGTCTTAGCTTGCTAAGGCCGATGGCGACCGGCGCACGGGTGAGTAACACGTATCCAACCTGCCGTCTACTCTTGGACAGCCTTCTGAAAGGAAGATTAATACAAGATGGCATCATGAGTCCGCATGTTCACATGATTAAAGGTATTCCGGTAGACGATGGGGATGCGTTCCATTAGATAGTAGGCGGGGTAACGGCCCACCTAGTCTTCGATGGATAGGGGTTCTGAGAGGAAGGTCCCCCACATTGGAACTGAGACACGGTCCAA	GRM10JK03DD313	Bacteria(100);Bacteroidetes(100);Bacteroidia(100);Bacteroidales(100);Bacteroidaceae(100);Bacteroides(100);unclassified;unclassified;unclassified;	0.000419609	0	0	0	0	0	0	0	0	0	0	0	0	0.000531067	0.000406835	0	0.0017331	0.00111654	0.00997862	0	0	0	0	0.00100806	0	0	0	0	0	0	0	0	0	0	0	0	0	0	0	0.00428901	0.00106065	0.00253501	0	0	0
462	95	AGTGAACGCTGGCGGCGTGCCTAATACATGCAAGTCGAACGATGAAGCTTTTAGCTTGCTAGAAGTGGATTAGTGGCGCACGGGTGAGTAATGCATAGGTTATGTGCCTCATAGTCTAGGATAGCCATTGGAAACGATGATTAATACTGGATACTCCCTACGGGGGAAAGTTTTTCGCTATGAGATCAGCCTATGTCCTATCAGCTTGTTGGTGAGGTAATGGCTCACCAAGGCTATGACGGGTATCCGGCCTGAGAGGGTGAACGGACACACTGGAACTGAGACACGGTCCAG	HDPIR2003F50FZ	Bacteria(100);Proteobacteria(100);Epsilonproteobacteria(100);Campylobacterales(100);Helicobacteraceae(100);Helicobacter(100);unclassified;unclassified;unclassified;	0.00172611	0	0	0	0	0	0	0	0	0	0	0	0	0	0	0	0	0	0	0	0	0	0	0.0927419	0	0	0	0	0	0.000245098	0	0.000126743	0	0	0	0	0	0	0	0	9.64227e-05	0	0	0	0
184	81	ATTGAACGCTGGCGGCAGGCTTAACACATGCAAGTCGAGCGGTAGCACAGGGGAGCTTGCTCCCTGGGTGACGAGCGGCGGACGGGTGAGTAATGTCTGGGAAACTGCCTGATGGAGGGGGATAACTACTGGAAACGGTAGCTAATACCGCATAACGTCGCAAGACCAAAGAGGGGGACCTTCGGGCCTCTTGCCATCAGATGTGCCCAGATGGGATTAGCTAGTAGGTGGGGTAATGGCTCACCTAGGCGACGATCCCTAGCTGGTCTGAGAGGATGACCAGCCACACTGGAACTGAGACACGGTCCAG	G4S51TB02ENIDD	Bacteria(100);Proteobacteria(100);Gammaproteobacteria(100);Enterobacteriales(100);Enterobacteriaceae(100);Enteric_Bacteria_cluster(100);Serratia(91);unclassified;unclassified;	0.000366185	0.00582437	0	0.000487567	0	0	0	0.00062474	0	0.00015058	0	0.000147667	0	0.00106213	0.000406835	0	0	0	0	0	0	0	0	0	0	0	0	0	0	0	0	0	0	0	0	0	0	0	0	0	0	0	0.0110701	0	0
170	80	ATTGAACGCTGGCGGCAGGCTTAACACATGCAAGTCGAGCGGAGTGATGGTGCTTGCACTATCACTTAGCGGCGGACGGGTGAGTAATGCTTAGGAATCTGCCATTTAGTGGGGGACAACATTCCGAAAGGAATGCTAATACCGCATACGTCCTACGGGAGAAAGCAGGGGATCTTCGGACCTTGCGCTAAATGATGAGCCTAAGTCGGATTAGCTAGTTGGTGGGGTAAAGGCCTACCAAGGCGACGATCTGTAGCGGGTCTGAGAGGATGATCCGCCACACTGGGACTGAGACACGGCCCAG	HDPIR2004I3ILA	Bacteria(100);Proteobacteria(100);Gammaproteobacteria(100);Pseudomonadales(100);Moraxellaceae(100);Acinetobacter(100);unclassified;unclassified;unclassified;	0.000911764	0	0	0	0	0	0	0.000416493	0	0	0	0	0	0	0	0.00036523	0.0034662	0.000697837	0	0	0.0218341	0	0	0	0.00643696	0	0.000936768	0	0	0.00441176	0	0.000380228	0.00364964	0.000156715	0	0.00323625	0	0	0	0.000659848	0.000289268	0.000965717	0	0	0
90	75	AGTGAACGCTGGCGGCATGCTTAACACATGCAAGTCGCACGGATGCTTCGGCATTAGTGGCGGACGGGTGAGTAACGCGTAGGGATCTATCCACGAGTGGGGGATAACTTTGGGAAACTGAAGCTAATACCGCATGATACCTGAGGGTCAAAGGCGCAAGTCGCCTGTGGAGGAACCTGCGTTCGATTAGCTAGTTGGTGGGGTAAAGGCCTACCAAGGCGATGATCGATAGCTGGTTTGAGAGGATGATCAGCCACACTGGGACTGAGACACGGCCCAG	G4S51TB02ET7TW	Bacteria(100);Proteobacteria(100);Alphaproteobacteria(100);Rhodospirillales(100);Acetobacteraceae(100);Gluconobacter(61);unclassified;unclassified;unclassified;	0.000651231	0.000448029	0.0219298	0.00219405	0.00129132	0.00628366	0	0.00124948	0	0.000301159	0	0	0	0.00106213	0.000406835	0	0	0	0	0	0	0	0	0	0	0	0	0	0	0	0	0	0	0	0	0	0	0	0	0	0	0	0	0	0
317	74	AGTGAACGCTGGCGGTAGGCCTAACACATGCAAGTCGAACGGCAGCACAGTAAGAGCTTGCTCTTATGGGTGGCGAGTGGCGGACGGGTGAGGAATACATCGGAATCTACTCTGTCGTGGGGGATAACGTAGGGAAACTTACGCTAATACCGCATACGACCTACGGGTGAAAGCAGGGGATCTTCGGACCTTGCGCGATTGAATGAGCCGATGTCGGATTAGCTAGTTGGCGGGGTAAAGGCCCACCAAGGCGACGATCCGTAGCTGGTCTGAGAGGATGATCAGCCACACTGGAACTGAGACACGGTCCAG	GRM10JK03C7VDV	Bacteria(100);Proteobacteria(100);Gammaproteobacteria(100);Xanthomonadales(100);Xanthomonadaceae(100);Stenotrophomonas(100);unclassified;unclassified;unclassified;	0.000472266	0	0	0	0	0	0.00218341	0	0	0.000301159	0	0	0	0.0031864	0	0.00036523	0	0.00209351	0.000475172	0	0.00436681	0	0	0	0.000378644	0.00383142	0.000234192	0	0	0	0	0	0	0	0	0.00107875	0	0	0	0.00362917	0.000964227	0.00241429	0	0	0
48	64	ATTGAACGCTGGCGGCAGGCCTAACACATGCAAGTCGAACGGTAACACAGAGAGCTTGCTCTTGGGTGACGAGTGGCGGACGGGTGAGTAATGTCTGGGAAACTGCCCGATGGAGGGGGATAACTACTGGAAACGGTAGCTAATACCGCATAACGTCGCAAGACCAAAGTGGGGGACCTTCGGGCCTCACACCATCGGATGTGCCCAGATGGGATTAGCTAGTAGGTGGGGTAATGGCTCACCTAGGCGACGATCCCTAGCTGGTCTGAGAGGATGACCAGCCACACTGGAACTGAGACACGGTCCAG	G4S51TB02CZ2E4	Bacteria(100);Proteobacteria(100);Gammaproteobacteria(100);Enterobacteriales(100);Enterobacteriaceae(100);Enteric_Bacteria_cluster(100);Erwinia(82);unclassified;unclassified;	0.000304298	0.00268817	0	0.0102389	0	0	0.00218341	0	0	0.000301159	0.000216029	0.000590667	0.000213767	0	0	0	0	0	0	0	0	0	0	0	0	0	0	0	0	0	0	0	0	0	0	0	0	0	0	0	0	0	0	0	0
111	63	GATGAACGCTGGCGGCGTGCCTAATACATGCAAGTCGAACGCGCTGTGGCAATTATTGAGAAGCTTGCTTCAATTTAATTGCAATGCAGCGAGTGGCGAACGGGTGAGTAACACGTGGGAAACCTACCTCTTAGCAGGGGATAACATTTGGAAACAGATGCTAATACCGTATAATAACTTTCATCGCATGATGAAAGTTTGAAAGATGGTTCTGCTATCACTAAGAGATGGTCCCGCGGTGTATTAGCTAGATGGTGAGGTAATGGCTCACCATGGCGATGATACATAGCCGAGTTGAGAGACTGATCGGCCACATTGGAACTGAGACACGGTCCAA	GRM10JK03CXI30	Bacteria(100);Firmicutes(98);Bacilli(97);Lactobacillales(89);Leuconostocaceae(75);Weissella(73);unclassified;unclassified;unclassified;	0.000192741	0	0	0	0	0	0	0.000208247	0	0	0	0.00753101	0.00213767	0.000531067	0	0	0	0	0	0	0	0	0	0	0	0	0	0	0	0	0	0	0	0	0	0	0	0	0	0	0	0	0	0	0
40	58	GACGAACGCTGGCGGCGTGCTTAACACATGCAAGTCGAACGGAAAGGCCGGGTGCTTGCACCCGGTACTCGAGTGGCGAACGGGTGAGTAACACGTGGGTGATCTGCCCTGCACTTCGGGATAAGCCTGGGAAACTGGGTCTAATACCGGATAGGACCATTGGTTGGTACTGGTGGTGGAAAGTTTTTCGGTGCAGGATGAGCTCGCGGCCTATCAGCTTGTTGGTGGGGTAATGGCCTACCAAGGCGGCGACGGGTAGCCGGCCTGAGAGGGTGGACGGCCACATTGGGACTGAGACACGGCCCAG	G4S51TB02DYOZJ	Bacteria(100);Actinobacteria(100);Actinobacteria(100);Actinobacteridae(100);Actinomycetales(100);Corynebacterineae(98);Corynebacteriaceae(96);Corynebacterium(96);unclassified;	0.000265779	0	0	0	0	0	0	0	0	0	0	0	0	0	0	0	0	0	0	0	0	0	0	0	0	0	0	0	0	0	0	0	0	0	0	0	0	0	0	0.000329924	0	0	0.0140221	0	0
125	58	ATTGAACGCTGGCGGCAGGCCTAACACATGCAAGTCGGGCGGTAACAGGGGAGCTTGCTCCTGCTGACGAGCGGCGGACGGGTGAGTAAAGTCTAGGAATCTGCCCAGTAGAGGGGGACAACGCGGGGAAACTCGCGCTAATACCGCATACGCCCTACGGGGGAAAGGTGCTTTATTGTACCGCTATTGGATGAGCCTAGATCAGATTAGCTAGTTGGTGGGGTAAAGGCCTACCAAGGCGACGATCTGTAGCTGGTCTGAGAGGATGATCAGCCACACTGGGACTGAGACACGGCCCAG	G4S51TB02C7NUA	Bacteria(100);Proteobacteria(100);Gammaproteobacteria(95);Oceanospirillales(48);Hahellaceae(29);Zooshikella(29);unclassified;unclassified;unclassified;	0.000220469	0	0	0	0	0	0	0.0114536	0	0.000451739	0	0	0	0	0	0	0	0	0	0	0	0	0	0	0	0	0	0	0	0	0	0	0	0	0	0	0	0	0	0	0	0	0	0	0
37	55	GAGCGAACGCTGGCGGCGTGCCTAATACATGCAAGTCGAACGCGCAGCGAAGAGTGCTTGCACTCTTCAAGCGAGTGGCGAACGGGTGAGTAACACGTGAATAACCTACCGAAAAGCAGGGGATAACATTTGGAAACAGATGCTAATACCGTATAAAACGTGCTGTCGCATGACAAAACGTTAAAAGGTCCGTTTGGACCACTTTTTGATGGATTCGCGGTGCATTAGTTAGTTGGTGGGGTAAAGGCTCACCAAGACGATGATGCATAGCCGAGTTGAGAGACTGACCGGCCACATTGGGACTGAGACACGGCCCAA	G4S51TB02END46	Bacteria(100);Firmicutes(100);Bacilli(100);Lactobacillales(100);Leuconostocaceae(100);Fructobacillus(100);unclassified;unclassified;unclassified;	0.000183451	0	0	0	0	0	0	0	0	0	0	0.00413467	0.0057717	0	0	0	0	0	0	0	0	0	0	0	0	0	0	0	0	0	0	0	0	0	0	0	0	0	0	0	0	0	0	0	0
221	52	ATTGAACGCTGGCGGCAGGCTTAACACATGCAAGTCGAACGGTAACAGAAGAGCTTGCTCTTGCTGACGAGTGGCGGACGGGTGAGTAATGTATGGGGATCTGCCAAATGGAAGGGGACAACAGTTGGAAACGACTGCTAATACCGTATAATGTCGCGAGACCAAAGTGTGGGACCTTCGGGCCACATGCCATTTGATGAACCCATATGGGATTAGCTAGTAGGTAGGGTAAAGGCCTACCTAGGCGACGATCTCTAGCTGGTCTGAGAGGATGACCAGCCACACTGGAACTGAGACACGGTCCAG	GRM10JK03DCORG	Bacteria(100);Proteobacteria(100);Gammaproteobacteria(98);Enterobacteriales(53);Enterobacteriaceae(53);Budvicia(8);unclassified;unclassified;unclassified;	0.000425005	0	0	0	0	0	0	0.00062474	0.000395101	0	0	0	0.0006413	0.0127456	0.00854353	0	0	0	0	0	0	0	0	0	0	0	0	0	0	0	0	0	0	0	0	0	0	0	0	0	0	0	0	0	0
422	52	GATGAACGCTAGCTACAGGCTTAACACATGCAAGTCGAGGGGCAGCATGGTCTTAGCTTGCTAAGGCTGATGGCGACCGGCGCACGGGTGAGTAACACGTATCCAACCTGCCGTCTACTCTTGGCCAGCCTTCTGAAAGGAAGATTAATCCAGGATGGGATCATGAGTTCACATGTCCGCATGATTAAAGGTATTTTCCGGTAGACGATGGGGATGCGTTCCATTAGATAGTAGGCGGGGTAACGGCCCACCTAGTCAACGATGGATAGGGGTTCTGAGAGGAAGGTCCCCCACATTGGAACTGAGACACGGTCCAA	GRM10JK03C7KN2	Bacteria(100);Bacteroidetes(100);Bacteroidia(100);Bacteroidales(100);Bacteroidaceae(100);Bacteroides(100);unclassified;unclassified;unclassified;	0.000173243	0	0	0	0	0	0	0	0	0	0	0.000295334	0.000213767	0.000531067	0	0	0.0017331	0.00181438	0.00213828	0	0	0	0	0	0	0	0	0	0	0	0	0	0	0	0	0	0	0	0	0	0.00154276	0.00108643	0	0	0
100	48	AGCGAACGCTGGCGGCATGCTTAACACATGCAAGTCGCACGAAGGTTTCGGCCTTAGTGGCGGACGGGTGAGTAACGCGTAGGAATCTATCCATGGGTGGGGGATAACTCCGGGAAACTGGAGCTAATACCGCATGATACCTGAGGGTCAAAGGCGCAAGTCGCCTGTGGAGGAACCTGCGTTCGATTAGCTAGTTGGTGGGGTAAAGGCCTACCAAGGCGATGATCGATAGCTGGTTTGAGAGGATGATCAGCCACACTGGAACTGAGATACGGTCCAG	GRM10JK03C6PP7	Bacteria(100);Proteobacteria(100);Alphaproteobacteria(100);Rhodospirillales(100);Acetobacteraceae(100);Gluconobacter(47);unclassified;unclassified;unclassified;	0.00031781	0	0.00438596	0	0	0	0	0	0.00434611	0.000451739	0.00194426	0	0.00277897	0	0.00325468	0	0	0	0	0	0	0	0	0	0	0	0	0	0	0	0	0	0	0	0	0	0	0	0	0	0	0	0	0	0
91	45	ATTGAACGCTGGCGGCAGGCCTAACACATGCAAGTCGAACGGTAACAGGAAGCAGCTTGCTGCTTTGCTGACGAGTGGCGGACGGGTGAGTAATGTCTGGGAAACTGCCTGATGGAGGGGGATAACTACTGGAAACGGTAGCTAATACCGCATAACGTCGCAAGACCAAAGAGGGGGACCTTCGGGCCTCTTGCCATCGGATGTGCCCAGATGGGATTAGCTAGTAGGTGGGGTAACGGCTCACCTAGGCGACGATCCCTAGCTGGTCTGAGAGGATGACCAGCCACACTGGAACTGAGACACGGTCCAG	G4S51TB02DTMH9	Bacteria(100);Proteobacteria(100);Gammaproteobacteria(100);Enterobacteriales(100);Enterobacteriaceae(100);Enteric_Bacteria_cluster(100);Citrobacter(48);unclassified;unclassified;	0.000319532	0	0	0	0	0	0	0.000208247	0	0	0	0	0.00235143	0	0.00203417	0	0	0.000139567	0.000950344	0	0.00436681	0	0	0.00100806	0.00113593	0	0	0	0.0037234	0	8.44167e-05	0.000126743	0	0	0	0	0	0	0	0.000329924	0.000674959	0.000120715	0	0	0
51	42	AGCGAACGCTGGCGGCATGCTTAACACATGCAAGTCGCACGAGAGCTTCGGCTCTAGTGGCGGACGGGTGAGTAACGCGTAGGAATCTATCCATGGGTGGGGGATAACTCTGGGAAACTGGAGCTAATACCGCATGATACCTGAGGGTCAAAGGCGCAAGTCGCCTGTGGAGGAGCCTGCGTTCGATTAGCTAGTTGGTGGGGTAAAGGCCTACCAAGGCGATGATCGATAGCTGGTTTGAGAGGATGATCAGCCACACTGGGACTGAGACACGGCCCAG	GRM10JK03CWVQA	Bacteria(100);Proteobacteria(100);Alphaproteobacteria(100);Rhodospirillales(100);Acetobacteraceae(100);Acetobacter(86);unclassified;unclassified;unclassified;	0.0001207	0	0	0	0	0	0	0	0	0.00572203	0.000648088	0.000147667	0	0	0	0	0	0	0	0	0	0	0	0	0	0	0	0	0	0	0	0	0	0	0	0	0	0	0	0	0	0	0	0	0
191	40	GATGAACGCTAGCGACAGGCCTAACACATGCAAGTCGAGGGGCAGCGAAGATGTAGCAATACATTTGTCGGCGACCGGCGCACGGGTGAGTAACACGTATGCAACCTGCCTACTACAGGGGGATAGCCCGTTGAAAGACGGATTAATACCCCATAACACAGGGCTCCCGCATGGGAATATTTGTTAAAGATTAATCGGTAGTAGATGGGCATGCGCTTCATTAGCTAGTTGGGGAGGTAACGGCTCACCAAGGCAACGATGAATAGGGGAACTGAGAGGTTTATCCCCCACACTGGTACTGAGACACGGACCAG	G4S51TB02ER60A	Bacteria(100);Bacteroidetes(100);Bacteroidia(100);Bacteroidales(100);Porphyromonadaceae(100);Dysgonomonas(90);unclassified;unclassified;unclassified;	0.000255825	0	0	0	0	0.000224417	0	0.00291545	0.00395101	0	0	0	0	0.00265534	0.00406835	0	0	0	0	0	0	0	0	0	0	0	0	0	0	0	0	0	0	0	0	0	0	0	0	0	0	0	0	0	0
140	40	GACGAACGCTGGCGGCGTGCTTAACACATGCAAGTCGAGCGGTAAGGCCTTTCGGGGTACACGAGCGGCGAACGGGTGAGTAACACGTGGGTGATCTGCCCTGCACTCTGGGATAAGCTTGGGAAACTGGGTCTAATACCGGATATGACCACAGCATGCATGTGTTGTGGTGGAAAGATTTATCGGTGCAGGATGGGCCCGCGGCCTATCAGCTTGTTGGTGGGGTAATGGCCTACCAAGGCGACGACGGGTAGCCGACCTGAGAGGGTGACCGGCCACACTGGGACTGAGACACGGCCCAG	G4S51TB02CYPJA	Bacteria(100);Actinobacteria(100);Actinobacteria(100);Actinobacteridae(100);Actinomycetales(100);Corynebacterineae(100);Nocardiaceae(100);Rhodococcus(100);unclassified;	0.000176232	0	0	0	0.00464876	0.00359066	0	0.000208247	0	0	0	0	0.00106883	0	0	0	0	0	0	0	0	0	0	0	0	0	0	0	0	0	0	0	0	0	0	0	0	0	0	0	0	0	0	0	0
50	35	AGCGAACGCTGGCGGCATGCTTAACACATGCAAGTCGCACGAAGGTTTCGGCCTTAGTGGCGGACGGGTGAGTAACGCGTAGGGATCTATCCACGGGTGGGGGACAACTTCGGGAAACTGGAGCTAATACCGCATGATACCTGAGGGTCAAAGGCGCAAGTCGCCTGTGGAGGAGCCTGCGTTTGATTAGCTTGTTGGTGGGGTAATGGCCTACCAAGGCGATGATCAATAGCTGGTCTGAGAGGATGATCAGCCACACTGGAACTGAGATACGGTCCAG	GRM10JK03DFHMO	Bacteria(100);Proteobacteria(100);Alphaproteobacteria(100);Rhodospirillales(100);Acetobacteraceae(100);Acetobacter(62);unclassified;unclassified;unclassified;	0.000218131	0.000224014	0	0.000487567	0.000516529	0.000224417	0.0010917	0	0.00553141	0	0.000432059	0.000147667	0.00149637	0	0.00162734	0	0	0	0	0	0	0	0	0	0	0	0	0	0	0	0	0	0	0	0	0	0	0	0	0	0	0	0	0	0
233	35	GACGAACGCTGGCGGCGTGCTTAACACATGCAAGTCGAGCGGTAAGGCCTTTCGGGGTACACGAGCGGCGAACGGGTGAGTAACACGTGGGTGATCTGCCCTGCACTTCGGGATAAGCCTGGGAAACTGGGTCTAATACCGGATATGACCTCAGGTTGCATGACTTGGGGTGGAAAGATTTATCGGTGCAGGATGGGCCCGCGGCCTATCAGCTTGTTGGTGGGGTAATGGCCTACCAAGGCGACGACGGGTAGCCGACCTGAGAGGGTGACCGGCCACACTGGGACTGAGACACGGCCCAG	G4S51TB02EHDLV	Bacteria(100);Actinobacteria(100);Actinobacteria(100);Actinobacteridae(100);Actinomycetales(100);Corynebacterineae(100);Nocardiaceae(100);Rhodococcus(99);unclassified;	0.000197635	0	0	0	0.00826446	0.000224417	0.00218341	0	0	0	0	0	0	0	0	0	0	0	0	0	0	0	0	0	0	0	0	0	0	0	0	0	0	0	0	0	0	0	0	0	0	0	0	0	0
46	34	AATGAACGCTGGCGGCAGGCCTAACACATGCAAGTCGCACGAAGGTTTCGGCCTTAGTGGCGGACGGGTGAGTAACGCGTAGGAATCTATCCATGGGTGGGGGATAACTCCGGGAAACTGGAGCTAATACCGCATGATACCTGAGGGTCAAAGGCGCAAGTCGCCTGTGGAGGAGCCTGCGTTCGATTAGCTAGTTGGTGGGGTAAAGGCCTACCAAGGCGATGATCGATAGCTGGTTTGAGAGGATGATCAGCCACACTGGGACTGAGACACGGCCCAG	GRM10JK03C88Y0	Bacteria(100);Proteobacteria(100);Alphaproteobacteria(100);Rhodospirillales(100);Acetobacteraceae(100);Acetobacter(84);unclassified;unclassified;unclassified;	0.000186172	0	0.00219298	0	0.000258264	0	0	0.000208247	0	0.000451739	0.00216029	0.000147667	0.00235143	0.00106213	0.0012205	0	0	0	0	0	0	0	0	0	0	0	0	0	0	0	0	0	0	0	0	0	0	0	0	0	0	0	0	0	0
232	33	ATTGAACGCTGGCGGCATGCCTTACACATGCAAGTCGAACGGTAACAGGTCTTCGGATGCTGACGAGTGGCGAACGGGTGAGTAATACATCGGAACGTGCCCGATCGTGGGGGATAACGAAGCGAAAGCTTTGCTAATACCGCATAAGATCTAAGGATGAAAGCAGGGGACCGCAAGGCCTTGCGCGAACGGAGCGGCCGATGGCAGATTAGGTAGTTGGTGGGATAAAAGCTTACCAAGCCGACGATCTGTAGCTGGTCTGAGAGGACGACCAGCCACACTGGGACTGAGACACGGCCCAG	HDPIR2003FLOUH	Bacteria(100);Proteobacteria(100);Betaproteobacteria(100);Burkholderiales(100);Comamonadaceae(100);Acidovorax(100);unclassified;unclassified;unclassified;	0.000508631	0	0	0	0	0	0	0	0	0	0	0	0	0	0	0	0	0.000558269	0	0	0.0218341	0	0	0	0	0	0	0	0.00106383	0	0	0	0	0	0	0	0	0	0	0.0013197	0.000192845	0.00156929	0	0	0
132	33	AGCGAACGCTGGCGGCATGCTTAACACATGCAAGTCGCACGGACCTTTCGGGGTGAGTGGCGGACGGGTGAGTATCGCGTAGGGATCTGTCCATGGGTGGGGGATAACACTGGGAAACTGGTGCTAATACCGCATGATACCTGAGGGTCAAAGGCGTAAGTCGCCTGTGGAGGAGCCTGCGTTCGATTAGCTTGTTGGTGGGGTAAAGGCCTACCAAGGCGATGATCGATAGCTGGTCTGAGAGGATGATCAGCCACACTGGGACTGAGACACGGCCCAG	G4S51TB02EWU8D	Bacteria(100);Proteobacteria(100);Alphaproteobacteria(100);Rhodospirillales(100);Acetobacteraceae(100);Asaia(73);unclassified;unclassified;unclassified;	0.000219939	0.000224014	0	0	0	0.00471275	0.00545852	0	0	0.000451739	0.000216029	0	0	0	0.00081367	0	0	0	0	0	0	0	0	0	0	0	0	0	0	0	0	0	0	0	0	0	0	0	0	0	0	0	0	0	0
187	32	ATTGAACGCTGGCGGCATGCTTTACACATGCAAGTCGAACGGTAACAGGTCTTCGGACGCTGACGAGTGGCGAACGGGTGAGTAATACATCGGAACGTGCCCAGTCGTGGGGGATAACTACTCGAAAGAGTAGCTAATACCGCATACGATCTGAGGATGAAAGCGGGGGACCTTCGGGCCTCGCGCGATTGGAGCGGCCGATGGCAGATTAGGTAGTTGGTGGGATAAAAGCTTACCAAGCCGACGATCTGTAGCTGGTCTGAGAGGACGACCAGCCACACTGGGACTGAGACACGGCCCAG	G4S51TB02DW090	Bacteria(100);Proteobacteria(100);Betaproteobacteria(100);Burkholderiales(100);Comamonadaceae(100);Delftia(100);unclassified;unclassified;unclassified;	0.00028145	0	0	0	0	0.000224417	0	0	0	0	0	0	0	0	0	0.00073046	0.0017331	0	0	0	0.00436681	0	0	0	0.00189322	0	0	0	0.000531915	0.00294118	0	0.000126743	0	0	0	0.00107875	0	0	0	0.000659848	9.64227e-05	0.000241429	0	0	0
139	31	AGCGAACGCTGGCGGCATGCTTAACACATGCAAGTCGCACGAAGGTTTCGGCCTTAGTGGCGGACGGGTGAGTAACGCGTAGGGATCTATCCACGGGTGGGGGACAACTTTGGGAAACTGAAGCTAATACCGCATGATACCTGAGGGTCAAAGGAGTGATCCGCTTGTGGAGGAACCTGCGTTTGATTAGCTAGTTGGTGGGGTAAAGGCCTACCAAGGCGATGATCGATAGCTGGTTTGAGAGGATGATCAGCCACACTGGGACTGAGACACGGCCCAG	G4S51TB02C8GRI	Bacteria(100);Proteobacteria(100);Alphaproteobacteria(100);Rhodospirillales(100);Acetobacteraceae(100);Gluconobacter(84);unclassified;unclassified;unclassified;	0.000141255	0.000224014	0.00109649	0.000975134	0.000774793	0.00359066	0	0	0	0.000752899	0	0	0.000213767	0	0	0	0	0	0	0	0	0	0	0	0	0	0	0	0	0	0	0	0	0	0	0	0	0	0	0	0	0	0	0	0
397	29	GACGAACGCTGGCGGCATGCCTAATACATGCAAGTCGAACGAGCTGCGCCTAATGATAGTTGATGCTTGCATTAACTTGACTTAAGTTAGCAGCGAGTGGCGAACTGGTGAGTAACACGTGGATAACCTGCCCAGAAGAAGGGGATAACACCTGGAAACAGATGCTAATACCGTATAACAACGAAAACCACATGGTTTTCGTTTGAAAGATGGCCTTTGTGCTATCGCTTTTGGATGGATCCGCGGCGCATTAGCTAGTTGGTGAGATAAAGGCTCACCAAGGCAATGATGCGTAGCCGACCTGAGAGGATGATCAGCCACACTGGAACTGAGATACGGTCCAG	HDPIR2003FZDEV	Bacteria(100);Firmicutes(94);Bacilli(93);Lactobacillales(85);Lactobacillaceae(64);Lactobacillus(41);unclassified;unclassified;unclassified;	0.00082206	0	0	0	0	0	0	0	0	0	0	0	0	0	0	0	0.00866551	0	0.000237586	0	0	0	0.008	0	0	0.0229885	0	0.000456621	0	0.000490196	0	0	0	0.00188058	0	0	0.00167224	0	0	0	0	0	0	0	0
598	29	GACGAACGCTGGCGGCGTGCTTAACACATGCAAGTCGAACGATGAAGCTGGAGCTTGCTCCGGTGGATTAGTGGCGAACGGGTGAGTAACACGTGAGCAATCTGCCCTTGACTCTGGGATAACTGCGGGAAACTGTAGCTAATACCGGATACGACCCTTGGAGGCATCTCTGGGGGTGGAAAGAATTTCGGTCAAGGATGAGCTCGCGGCCTATCAGCTAGTTGGTGAGGTAATGGCTCACCAAGGCGACGACGGGTAGCCGGCCTGAGAGGGTGACCGGCCACACTGGAACTGAGACACGGTCCAG	GRM10JK03DI41D	Bacteria(100);Actinobacteria(100);Actinobacteria(100);Actinobacteridae(100);Actinomycetales(100);Micrococcineae(100);Microbacteriaceae(100);Candidatus_Rhodoluna(100);unclassified;	0.000173205	0	0	0	0	0	0	0	0	0	0	0	0	0.00106213	0	0	0	0.000139567	0	0	0	0	0	0	0	0	0	0	0.00265957	0.00122549	0	0	0	0	0	0.00107875	0	0	0	0.00164962	0.000192845	0.000603573	0	0	0
65	28	ATTGAACGCTGGCGGCAGGCCTAACACATGCAAGTCGAGCGGTAGCACGGGAGAGCTTGCTCTCTGGGTGACGAGCGGCGGACGGGTGAGTAATGTCTGGGAAACTGCCTGATGGAGGGGGATAACTACTGGAAACGGTAGCTAATACCGCATAACGTCTTCGGACCAAAGTGGGGGACCTTAGGGCCTCACACCATCGGATGTGCCCAGATGGGATTAGCTAGTAGGTGGGGTAATGGCTCACCTAGGCGACGATCCCTAGCTGGTCTGAGAGGATGACCAGCCACACTGGAACTGAGACACGGTCCAG	G4S51TB02DLT2X	Bacteria(100);Proteobacteria(100);Gammaproteobacteria(100);Enterobacteriales(100);Enterobacteriaceae(100);Enteric_Bacteria_cluster(100);Serratia(57);unclassified;unclassified;	0.000233197	0.00224014	0	0.00219405	0.000516529	0	0.00764192	0	0	0	0	0	0	0	0	0	0	0	0	0	0	0	0	0	0	0	0	0	0	0	0	0	0	0	0	0	0	0	0	0	0	0	0	0	0
333	26	GATGAACGCTGGCGGCGTGCCTAATACATGCAAGTCGAACGCTTTGTGGTTCAACTGATTTGAAGAGCTTGCTCAGATATGACGATGGACATTGCAAAGAGTGGCGAACGGGTGAGTAACACGTGGGAAACCTACCTCTTAGCAGGGGATAACATTTGGAAACAGATGCTAATACCGTATAACAATGACAACCGCATGGTTGTTATTTAAAAGATGGTTCTGCTATCACTAAGAGATGGTCCCGCGGTGCATTAGCTAGTTGGTAAGGTAATGGCTTACCAAGGCGATGATGCATAGCCGAGTTGAGAGACTGATCGGCCACAATGGGACTGAGACACGGCCCAT	GRM10JK03DIOUA	Bacteria(100);Firmicutes(100);Bacilli(100);Lactobacillales(100);Leuconostocaceae(100);Weissella(100);unclassified;unclassified;unclassified;	0.000209687	0	0	0	0	0	0	0	0	0	0	0	0	0.0031864	0.0081367	0	0	0	0	0	0	0	0	0	0	0	0	0	0	0	0	0	0	0	0	0	0	0	0	0	0	0	0	0	0
378	26	ATTGAACGCTGGCGGCAGGCTTAACACATGCAAGTCGAACGGTAACGGGAAGTAGCTTGCTACTTTGCTGACGAGTGGCGGACGGGTGAGTAACGTATGGGAATTTACCGAATGGAGGGGGACAACAGTTGGAAACGGCTGCTAATACCGCATAACGTCGAGAGACCAAAGGGTGGGACCTACGGGCCACTTGCCATTTGATGAGCCCATATGAGATTAGCTAGTTGGTGTGGTAATGGCTCACCAAGGCGACGATCTCTAGCTGGTTTGAGAGGATGACCAGCCACACTGGGACTGAGACACGGCCCAG	GRM10JK03CZ7B8	Bacteria(100);Proteobacteria(97);Gammaproteobacteria(90);Oceanospirillales(31);Oceanospirillaceae(31);Balneatrix(31);unclassified;unclassified;unclassified;	9.9008e-05	0	0	0	0	0	0	0	0	0	0	0.00118133	0.00363403	0.000531067	0	0	0	0	0	0	0	0	0	0	0	0	0	0	0	0	0	0	0	0	0	0	0	0	0	0	0	0	0	0	0
197	25	ATTGAACGCTGGCGGCAGGCCTAACACATGCAAGTCGGCGGTAACAGGTCTTTCGGGATGCTGACGAGCGGCGGACGGGTGAGTAAAGTCTAGGAATCTGCCCAGTAGTGGGGGACAACGCGGGGAAACTCGCGCTAATACCGCATACGCCCTACGGGGGAAAGGTGCTTTATTGTACCGCTATTGGATGAGCCTAGATCAGATTAGCTAGTTGGTAGGGTAAAAGCCTACCAAGGCGACGATCTGTAGCTGGTCTGAGAGGATGATCAGCCACACTGGGACTGAGACACGGCCCAG	G4S51TB02CX9UM	Bacteria(100);Proteobacteria(100);Candidatus_Thiobios(20);unclassified;unclassified;unclassified;unclassified;unclassified;unclassified;	0.000188349	0	0	0	0	0	0	0	0	0	0	0	0	0	0.0101709	0	0	0	0	0	0	0	0	0	0	0	0	0	0	0	0	0	0	0	0	0	0	0	0	0	0	0	0	0	0
253	25	ATTGAACGCTGGCGGCAGGCCTAACACATGCAAGTCGAGCGGTAACAGGGGAAGCTTGCTTCTCGCTGACGAGCGGCGGACGGGTGAGTAATGTATGGGGATCTGCCCGATAGAGGGGGATAACTACTGGAAACGGTAGCTAATACCGCATAATCTCTCAGGAGCAAAGCAGGGGAACTTCGGTCCTTGCGCTATCGGATGAACCCATATGGGATTAGCTAGTAGGTGAGGTAATGGCTCACCTAGGCGACGATCCCTAGCTGGTCTGAGAGGATGATCAGCCACACTGGACTGAGACACGGCCCAG	G4S51TB02DYMZG	Bacteria(100);Proteobacteria(100);Gammaproteobacteria(100);Enterobacteriales(100);Enterobacteriaceae(100);Providencia(100);unclassified;unclassified;unclassified;	0.000188349	0	0	0	0	0	0	0	0	0	0	0	0	0	0.0101709	0	0	0	0	0	0	0	0	0	0	0	0	0	0	0	0	0	0	0	0	0	0	0	0	0	0	0	0	0	0
209	25	GATGAACGCTGGCGGCGTGCCTAATACATGCAAGTCGAACGCGCTGTGGCAATTATTGAGAAGCTTGCTTCAATTTAATTGCAATGCAGCGAGTGGCGAACGGGTGAGTAACACGTGGGAAACCTACCTCTTAGCAGGGGATAACATTTGGAAACAGATGCTAATACCGTATAACAACTTTTATCGCATGATAAAAGTTTAAAAGATGGTTCTGCTATCACTAAGAGATGGTCCCGCGGTGTATTAGCTAGATGGTGAGGTAATGGCTCACCATGGCGATGATACATAGCCGAGTTGAGAGACTGATCGGCCACATTGGAACTGAGACACGGTCCAA	GRM10JK03C8A2Z	Bacteria(100);Firmicutes(100);Bacilli(100);Lactobacillales(96);Leuconostocaceae(90);Weissella(82);unclassified;unclassified;unclassified;	9.36823e-05	0	0	0	0	0	0	0	0	0	0	0.00236267	0.00106883	0	0.00162734	0	0	0	0	0	0	0	0	0	0	0	0	0	0	0	0	0	0	0	0	0	0	0	0	0	0	0	0	0	0
204	25	AGCGAACGCTGGCGGCATGCTTAACACATGCAAGTCGCACGAAGGCTTCGGCCTTAGTGGCGGACGGGTGAGTAACGCGTAGGAATCTATCCATGGGTGGGGGATAACTCCGGGAAACTGGAGCTAATACCGCATGATACCTGAGGGTCAAAGGCGCAAGTCGCCTGTGGAGGAGCCTGCGTTTGATTAGCTTGTTGGTGGGGTAAAGGCCTACCAAGGCGATGATCAATAGCTGGTCTGAGAGGGTAATCGGCCACATTGGGACTGAGACACGGCCCAA	G4S51TB02DPI7L	Bacteria(100);Proteobacteria(100);Alphaproteobacteria(100);Rhodospirillales(100);Acetobacteraceae(100);Acetobacter(99);unclassified;unclassified;unclassified;	8.70476e-05	0	0	0	0	0	0	0	0	0	0	0	0	0	0	0	0	0	0	0	0	0	0	0	0	0	0	0	0	0	0	0	0	0	0	0	0	0.000235405	0	0	0.000578536	0	0.00098401	0.000818498	0.00113173
193	24	AGCGAACGCTGGCGGCATGCTTAACACATGCAAGTCGCACGGATCTTTCGGGATCAGTGGCGGACGGGTGAGTAACGCGTAGGGATCTATCCATGGGTGGGGGACAACTCCGGGAAACTGGAGCTAATACCGCATGATACCTGAGGGTCAAAGGCGCAAGTCGCCTGTGGAGGAGCCTGCGTTTGATTAGCTTGTTGGTGGGGTAATGGCCTACCAAGGCGATGATCAATAGCTGATCTGAGAGGATGATCAGCCACACTGGAACTGAGATACGGTCCAG	G4S51TB02EOAFX	Bacteria(100);Proteobacteria(100);Alphaproteobacteria(100);Rhodospirillales(100);Acetobacteraceae(100);Gluconobacter(55);unclassified;unclassified;unclassified;	0.000170762	0	0.00438596	0	0	0	0	0	0.0011853	0	0.00151221	0	0.00213767	0	0	0	0	0	0	0	0	0	0	0	0	0	0	0	0	0	0	0	0	0	0	0	0	0	0	0	0	0	0	0	0
203	24	GACGAACGCTGGCGGCGTGCTTAACACATGCAAGTCGAGCGGTAAGGCCTTTCGGGGTACACGAGCGGCGAACGGGTGAGTAACACGTGGGTGATCTGCCCTGCACTCTGGGATAAGCCTGGGAAACTGGGTCTAATACTGGATATGACCTCAGCATGCATGTGCTGGGGTGGAAAGCTTTTGTGGTGCAGGATGGGCCCGCGGCCTATCAGCTTGTTGGTGGGGTAATGGCCTACCAAGGCGACGACGGGTAGCCGACCTGAGAGGGTGACCGGCCACACTGGGACTGAGACACGGCCCAG	GRM10JK03DMMBD	Bacteria(100);Actinobacteria(100);Actinobacteria(100);Actinobacteridae(100);Actinomycetales(100);Corynebacterineae(100);Nocardiaceae(100);Rhodococcus(99);unclassified;	0.000159063	0.000224014	0.00219298	0	0.00206612	0	0.0010917	0	0	0.000301159	0.000432059	0.000295334	0.0006413	0.000531067	0.00081367	0	0	0	0	0	0	0	0	0	0	0	0	0	0	0	0	0	0	0	0	0	0	0	0	0	0	0	0	0	0
163	24	GACGAACGCTGGCGGCGTGCCTAATACATGCAAGTCGAACGAAGCTGTTTTAACTGGTGCTTGCACCGACTTAAACAACTGAGTGGCGAACGGGTGAGTAACACGTGGGTAACCTGCCCCAAAGCGGGGGATAACATTTGGAAACAGATGCTAATACCGCATAACCACAGAAACCACATGGTTTCTGTGTCAAAGATGGTTTCGGCTATCACTTTGGGATGGACCCGCGGCGTATTAGCTAGTTGGTAAGGTAATGGCTTACCAAGGCAATGATACGTAGCCGAACTGAGAGGTTGATCGGCCACATTGGGACTGAGACACGGCCCAA	GRM10JK03DO1W8	Bacteria(100);Firmicutes(100);Bacilli(100);Lactobacillales(100);Lactobacillaceae(100);Lactobacillus(100);unclassified;unclassified;unclassified;	0.000152	0	0	0	0	0	0	0	0	0.00105406	0	0.000147667	0	0.00212427	0.00488202	0	0	0	0	0	0	0	0	0	0	0	0	0	0	0	0	0	0	0	0	0	0	0	0	0	0	0	0	0	0
299	24	GATGAACGCTGGCGGCGTGCCTAATACATGCAAGTCGAACGAGCTGCGCCTAATGATAGTTGATGCTTGCATTAACTTGACTTAAGTTAGCAGCGAGTGGCGAACTGGTGAGTAACACGTGGATAACCTGCCCAGAAGAAGGGGATAACACCTGGAAACAGATGCTAATACCGTATAACAATGAAAACCACATGGTTTTCGTTTGAAAGATGGCCTTTGTGCTATCGCTTTTGGATGGATCCGCGGCGCATTAGCTAGTTGGTGAGATAAAGGCTCACCAAGGCAATGATGCGTAGCCGACCTGAGAGGGTAATCGGCCACATTGGGACTGAGACACGGCCCAG	G4S51TB02DIU4W	Bacteria(100);Firmicutes(99);Bacilli(97);Lactobacillales(95);Lactobacillaceae(89);Lactobacillus(70);unclassified;unclassified;unclassified;	9.36726e-05	0	0	0	0	0	0	0	0	0	0	0	0	0	0	0	0.0017331	0.00293091	0.000237586	0	0	0	0	0	0	0	0	0	0	0	0	0	0	0.000156715	0	0	0	0	0	0	0	0	0	0	0
82	23	GACGAACGCTGGCGGCGCGCCTAACACATGCAAGTCGAACGAGCGAGAGAGAGCTTGCTTTCTCGAGCGAGTGGCGAACGGGTGAGTAACGCGTGAGGAACCTGCCTCAAAGAGGGGGACAACAGTTGGAAACGACTGCTAATACCGCATAAGCCCACGGCTCGGCATCGAGCAGAGGGAAAAGGAGCAATCCGCTTTGAGATGGCCTCGCGTCCGATTAGCTAGTTGGTGAGGTAATGGCCCACCAAGGCAACGATCGGTAGCCGGACTGAGAGGTTGAACGGCCACATTGGGACTGAGACACGGCCCAG	GRM10JK03DJ09M	Bacteria(100);Firmicutes(100);Clostridia(100);Clostridiales(100);Ruminococcaceae(100);Faecalibacterium(100);unclassified;unclassified;unclassified;	0.000120872	0	0	0	0	0	0	0	0	0	0	0	0.000213767	0	0	0.00109569	0	0.000837404	0.000475172	0	0	0	0	0.00100806	0	0	0	0	0	0	0	0	0	0	0	0	0	0	0.00123153	0.000989772	0.000192845	0.000482859	0	0	0
261	23	ATTGAACGCTGGCGGCATGCCTTACACATGCAAGTCGAACGGCAGCATAGGAGCTTGCTCCTGATGGCGAGTGGCGAACGGGTGAGTAATATATCGGAACGTGCCCTAGATGGGGGATAACTAGTTGAAAGACTAGCTAATACCGCATACGATCTAAGGATGAAAGTGGGGGATCGCAAGACCTCATGCTCATGGAGCGGCCGATATCTGATTAGCTAGTTGGTGAGGTAAAAGCTCACCAAGGCGACGATCAGTAGCTGGTCTGAGAGGACGATCAGCCACATTGGGACTGAGACACGGCCCAA	G4S51TB02DPF37	Bacteria(100);Proteobacteria(100);Betaproteobacteria(100);Burkholderiales(100);Oxalobacteraceae(100);Herbaspirillum(91);unclassified;unclassified;unclassified;	0.000104536	0	0	0.0043881	0	0	0	0	0	0.00015058	0	0.000147667	0.000427533	0.000531067	0	0	0	0	0	0	0	0	0	0	0	0	0	0	0	0	0	0	0	0	0	0	0	0	0	0	0	0	0	0	0
134	22	ATTGAACGCTGGCGGCAGGCCTAACACATGCAAGTCGAGCGGTAGCACGGGAGAGCTTGCTCTCTGGGTGACGAGCGGCGGACGGGTGAGTAATGTCTGGGAAACTGCCTGATGGAGGGGGATAACTACTGGAAACGGTAGCTAATACCGCATAACGTCGCAAGACCAAAGAGGGGGACCTTCGGGCCTCTTGCCATCGGATGTGCCCAGATGGGATTAGCTAGTAGGTGGGGTAATGGCTCACCTAGGCGACGATCCCTAGCTGGTCTGAGAGGATGACCAGCCACACTGGAACTGAGACACGGTCCAG	G4S51TB02EJ39K	Bacteria(100);Proteobacteria(100);Gammaproteobacteria(100);Enterobacteriales(100);Enterobacteriaceae(100);Enteric_Bacteria_cluster(100);Serratia(90);unclassified;unclassified;	8.58643e-05	0.000896057	0	0.00219405	0	0	0	0	0	0	0	0.00118133	0	0	0	0.00036523	0	0	0	0	0	0	0	0	0	0	0	0	0	0	0	0	0	0	0	0	0	0	0	0	0	0	0	0	0
893	21	AGCGAACGCTGGCGGCATGCTTAACACATGCAAGTCGCACGGACCTTTCGGGGTGAGTGGCGGACGGGTGAGTAACGCGTAGGGATCTATCCACGGGTGGGGGATAACATCGGGAAACTGATGCAATACCGCATGATACCTGAGGGTCAAAGGCGCAAGTCGCCTGTGGAGGAACCTGCGTTCGATTAGCTTGTTGGTGGGGTAAAGGCCTACCAAGGCGATGATCGATAGCTGGTCTGAGAGGATGATCAGCCACACTGGGACTGAGACACGGCCCAG	HDPIR2003F5IN2	Bacteria(100);Proteobacteria(100);Alphaproteobacteria(100);Rhodospirillales(100);Acetobacteraceae(100);Asaia(85);unclassified;unclassified;unclassified;	0.000206526	0	0	0	0	0	0	0	0	0	0	0	0	0.0111524	0	0	0	0	0	0	0	0	0	0	0	0	0	0	0	0	0	0	0	0	0	0	0	0	0	0	0	0	0	0	0
122	21	GACGAACGCTGGCGGCATGCCTAATACATGCAAGTCGAACGAGCTGCGCCTAATGATAGTTGATGCTTGCATAACTTGACTTAAGTTAGCAGCGAGTGGCGAACTGGTGAGTAACACGTGGATAACCTGCCCAGAAGAAGGGGATAACACCTGGAAACAGATGCTAATACCGTATAACAATGAAAACCACATGGTTTTCATTTGAAAGATGGCCTTTGTGCTATCGCTTTTGGATGGATCCGCGGCGCATTAGCTAGTTGGTGAGATAAAGGCTCACCAAGGCAATGATGCGTAGCCGACCTGAGAGGGTAATCGGCCACATTGGGACTGAGACACGGCCCAG	HDPIR2003GFHP6	Bacteria(100);Firmicutes(97);Bacilli(95);Lactobacillales(92);Lactobacillaceae(86);Lactobacillus(73);unclassified;unclassified;unclassified;	0.000160211	0	0	0	0	0	0	0	0	0	0	0	0	0	0	0	0	0.000139567	0.000712758	0.000343407	0	0	0	0	0.000757289	0.00383142	0	0	0	0.000980392	0.000337667	0	0	0.000470146	0	0.00107875	0	0	0	0	0	0	0	0	0
178	21	GACGAACGCTGGCGGCGTGCTTAACACATGCAAGTCGAACGGTGAAGCCCTTCGGGGTGGATCAGTGGCGAACGGGTGAGTAACACGTGGGGAATCTACCCTGAACTCTGGGACAAGCCTTGGAAACGAGGTCTAATACCGGATACGACCTTCTCCTGCATGGGGGTTGGTGGAAAGCTCCGGCGGTTCAGGATGATCCCGCGGCCTATCAGCTTGTTGGTGGGGTAATGGCCTACCAAGGCGACGACGGGTAGCCGGCCTGAGAGGGCGACCGGCCACACTGGAACTGAGATACGGTCCAG	G4S51TB02C9X2C	Bacteria(100);Actinobacteria(100);Actinobacteria(100);Actinobacteridae(100);Actinomycetales(100);Streptomycineae(100);Streptomycetaceae(100);Kitasatospora(98);unclassified;	0.000158214	0	0	0	0	0	0	0	0	0	0	0	0	0	0.00854353	0	0	0	0	0	0	0	0	0	0	0	0	0	0	0	0	0	0	0	0	0	0	0	0	0	0	0	0	0	0
393	20	AACGAACGCTGGCGGTGCGTCTTAAGCATGCAAGTTGAACGAATTGTAGCAATACAGTTAGTGGCGAACGGGTGAGTAACGCGTAGATAATCTACCTTTAAGTGGGGGACAACTTGGGGAAACTCAAGCTAATACCGCATAATCTTACTGATGTTGATTGGTAAGGAAAGGAGCTTCAAAGCTTCGCTTTTAGATGAGTCTGCGTCCTATTAGCTAGTTGGTGGGGTAAAAGCCTACCAAGGCGACGATAGGTAGCCGGCCTGAGAGGGTGGTCGGCCACACTGGGACTGAGACACGGCCCAG	G4S51TB02DFAL9	Bacteria(100);Firmicutes(42);Clostridia(35);Clostridiales(25);Family_XI_Incertae_Sedis(17);Clostridiaceae(17);Soehngenia(17);Clostridiaceae(17);Soehngenia(17);	0.0001555	0	0	0	0	0	0	0.000208247	0.000395101	0.000301159	0	0.000147667	0	0.00531067	0.00203417	0	0	0	0	0	0	0	0	0	0	0	0	0	0	0	0	0	0	0	0	0	0	0	0	0	0	0	0	0	0
403	20	GACAACGCTGGCGGCGTGCTTAACACATGCAAGTCGAGCGGTAAGGCCTTTCGGGGTACACGAGCGGCGAACGGGTGAGTAACACGTGGGTGATCTGCCCTGCACTCTGGGATAAGCCTGGGAAACTGGGTCTAATACTGGATATGACCGTGGGATGCATGTTTCATGGTGGAAAGCTTTTGTGGTGCAGGATGGGCCCGCGGCCTATCAGCTTGTTGGTGGGGTAATGGCCTACCAAGGCGACGACGGGTAGCCGACCTGAGAGGGTGACCGGCCACACTGGGACTGAGACACGGCCCAG	G4S51TB02DLE7J	Bacteria(100);Actinobacteria(100);Actinobacteria(100);Actinobacteridae(100);Actinomycetales(100);Corynebacterineae(97);Nocardiaceae(97);Rhodococcus(94);unclassified;	0.00012661	0	0.00109649	0	0.00464876	0	0.0010917	0	0	0	0	0	0	0	0	0	0	0	0	0	0	0	0	0	0	0	0	0	0	0	0	0	0	0	0	0	0	0	0	0	0	0	0	0	0
817	20	AGTGAACGCTGGCGGTAGGCCTAACACATGCAAGTCGAACGGCAGCACAGTAAGAGCTTGCTCTTATGGGTGGCGAGTGGCGGACGGGTGAGGAATACATCGGAATCTACCTTTCGTGGGGGATAACGTAGGGAAACTTACGCTAATACCGCATACGACCTTCGGGTGAAAGCAGGGGACCTTCGGGCCTTGCGCGGATAGATGAGCCGATGTCGGATTAGCTAGTTGGCGGGGTAAAGGCCCACCAAGGCGACGATCCGTAGCTGGTCTGAGAGGATGATCAGCCACACTGGAACTGAGACACGGTCCAG	GRM10JK03CX60J	Bacteria(100);Proteobacteria(100);Gammaproteobacteria(100);Xanthomonadales(100);Xanthomonadaceae(100);Stenotrophomonas(98);unclassified;unclassified;unclassified;	5.8722e-05	0	0	0	0	0	0	0	0	0	0	0	0	0	0	0	0	0.00167481	0	0	0	0	0	0	0	0	0	0	0	0	0	0	0	0	0	0	0	0	0	0.000989772	0.000385691	0.000120715	0	0	0
264	18	GATGAACGCTAGCGGCAGGCTTAACACATGCAAGTCGAGGGGTATAGTTCTTCGGAGCTAGAGACCGGCGCACGGGTGCGTAACGCGTATGCAATCTACCTTTTACAGAGGGATAGCCCAGAGAAATTTGGATTAATACCTCATAGTATGTGAGAATCGCATGGTTTTCACATTAAAGTTCCAACGGTAAAAGATGAGCATGCGTCCCATTAGCTAGATGGTAAGGTAACGGCTTACCATGGCGACGATGGGTAGGGGTCCTGAGAGGGAGATCCCCCACACTGGTACTGAGACACGGACCAG	GRM10JK03DDUA5	Bacteria(100);Bacteroidetes(100);Flavobacteria(100);Flavobacteriales(100);Flavobacteriaceae(100);Flavobacterium(100);unclassified;unclassified;unclassified;	0.00016013	0	0	0	0	0	0	0.000208247	0	0	0	0	0	0	0	0	0	0.000139567	0.000237586	0	0.00436681	0	0	0	0	0	0	0	0.00106383	0	0	0	0	0	0	0	0	0	0	0.00197954	0.000289268	0.000362144	0	0	0
87	18	AGCGAACGCTGGCGGCATGCTTAACACATGCAAGTCGCACGAGAGCTTCGGCTCTAGTGGCGGACGGGTGAGTAACGCGTAGGAATCTATCCATGGGTGGGGGATAACATCGGGAAACTGGTGCTAATACCGCATGATACCTGAGGGTCAAAGGCGCAAGTCGCCTGTGGAGGAGCCTGCGTTTGATTAGCTTGTTGGTGGGGTAATGGCCTACCAAGGCGATGATCAATAGCTGGTCTGAGAGGATGATCAGCCACACTGGGACTGAGACACGGCCCAG	GRM10JK03DIQFX	Bacteria(100);Proteobacteria(100);Alphaproteobacteria(100);Rhodospirillales(100);Acetobacteraceae(100);Acetobacter(87);unclassified;unclassified;unclassified;	5.14053e-05	0	0	0	0	0	0	0	0	0.00255986	0.000216029	0	0	0	0	0	0	0	0	0	0	0	0	0	0	0	0	0	0	0	0	0	0	0	0	0	0	0	0	0	0	0	0	0	0
454	17	ATTGAACGCTGGCGGCATGCCTTACACATGCAAGTCGAACGGCAGCACGGGAGCAATCCTGGTGGCGAGTGGCGAACGGGTGAGTAATATATCGGAACGTGCCCAGTCGTGGGGGATAACGTAGCGAAAGCTACGCTAATACCGCATACGATCTACGGATGAAAGCGGGGGATCGCAAGACCTCGCGCGATTGGAGCGGCCGATATCAGATTAGGTAGTTGGTGAGGTAAAGGCTCACCAAGCCGACGATCTGTAGCTGGTCTGAGAGGACGACCAGCCACACTGGGACTGAGACACGGCCCAG	GRM10JK03CY445	Bacteria(100);Proteobacteria(100);Betaproteobacteria(100);Burkholderiales(100);Comamonadaceae(100);Aquamonas(81);unclassified;unclassified;unclassified;	0.00014237	0.000448029	0	0	0.000258264	0	0.0010917	0	0	0.00015058	0.000648088	0.000295334	0.000427533	0	0	0	0	0.000139567	0	0	0	0	0	0	0	0.00383142	0	0	0	0	0	0	0	0	0	0	0	0	0	0	0.000192845	0	0	0.000204625	0
36	17	AGCGAACGCTGGCGGCATGCTTAACACATGCAAGTCGCACGGATCTTTCGGGATTAGTGGCGGACGGGTGAGTAACGCGTAGGAATCTATCCACGGGTGGGGGATAACTTCGGGAAACTGAAGCTAATACCGCATGATACCTGAGGGTCAAAGGCGCAAGTCGCCTGTGGAGGAGCCTGCGTTTGATTAGCTTGTTGGTGGGGTAATGGCCTACCAAGGCGATGATCGATAGCTGGTTTGAGAGGATGATCAGCCACACTGGGACTGAGACACGGCCCAG	G4S51TB02DPXYI	Bacteria(100);Proteobacteria(100);Alphaproteobacteria(100);Rhodospirillales(100);Acetobacteraceae(100);Acetobacter(64);unclassified;unclassified;unclassified;	6.48762e-05	0	0	0	0	0.000448833	0	0.000832986	0	0	0.000216029	0.000295334	0.00171013	0	0	0	0	0	0	0	0	0	0	0	0	0	0	0	0	0	0	0	0	0	0	0	0	0	0	0	0	0	0	0	0
508	16	AATGAACGCTGGCGGCATGCTTAACACATGCAAGTCGCACGGATGCTTCGGCATTAGTGGCGGACGGGTGAGTAACGCGTAGGGATCTATCCACGAGTGGGGGATAACTTCGGGAAACTGGAGCTAATACCGCATGATACCTGAGGGTCAAAGGCGCAAGTCGCCTGTGGAGGAACCTGCGTTCGATTAGCTAGTTGGTGGGGTAAAGGCCTACCAAGGCAATGATCTATAGCTGATCTGAGAGGATGATCAGCCACACTGGAACTGAGATACGGTCCAG	HDPIR2004IG7FD	Bacteria(100);Proteobacteria(100);Alphaproteobacteria(100);Rhodospirillales(100);Acetobacteraceae(100);Gluconobacter(62);unclassified;unclassified;unclassified;	0.000324886	0	0.0175439	0	0	0	0	0	0	0	0	0	0	0	0	0	0	0	0	0	0	0	0	0	0	0	0	0	0	0	0	0	0	0	0	0	0	0	0	0	0	0	0	0	0
79	16	AGCGAACGCTGGCGGCATGCTTAACACATGCAAGTCGCACGAACCTTTCGGGGTTAGTGGCGGACGGGTGAGTAACGCGTAGGGATCTATCCATGGGTGGGGGACAACTCCGGGAAACTGGAGCTAATACCGCATGATACCTGAGGGTCAAAGGCGCAAGTCGCCTGTGGAGGAGCCTGCGTTTGATTAGCTTGTTGGTGGGGTAATGGCCTACCAAGGCGATGATCAATAGCTGGTCTGAGAGGATGATCAGCCACACTGGGACTGAGACACGGCCCAG	GRM10JK03DNZ3H	Bacteria(100);Proteobacteria(100);Alphaproteobacteria(100);Rhodospirillales(100);Acetobacteraceae(100);Acetobacter(80);unclassified;unclassified;unclassified;	6.37828e-05	0	0	0	0	0	0	0.000832986	0.000790202	0.000602319	0.000216029	0.000147667	0.000855066	0	0	0	0	0	0	0	0	0	0	0	0	0	0	0	0	0	0	0	0	0	0	0	0	0	0	0	0	0	0	0	0
78	16	AGCGAACGCTGGCGGCATGCTTAACACATGCAAGTCGCACGAAGGTTTCGGCCTTAGTGGCGGACGGGTGAGTAACGCGTAGGAATCTATCCATGGGTGGGGGATAACTCCGGGAAACTGGAGCTAATACCGCATGATACCTGAGGGTCAAAGGCGCAAGTCGCCTGTGGAGGAGCCTGCGTTCGATTAGCTAGTTGGTGGGGTAACTGCCTACCAAGGCGATGATCGATAGCTGGTCTGAGAGGATGATCAGCCACACTGGGACTGAGACACGGCCCAG	GRM10JK03DL8WY	Bacteria(100);Proteobacteria(100);Alphaproteobacteria(100);Rhodospirillales(100);Acetobacteraceae(100);Acetobacter(97);unclassified;unclassified;unclassified;	6.35233e-05	0	0	0	0	0	0	0	0	0.0015058	0.000432059	0.000147667	0	0.000531067	0.00081367	0	0	0	0	0	0	0	0	0	0	0	0	0	0	0	0	0	0	0	0	0	0	0	0	0	0	0	0	0	0
116	16	AGCGAACGCTGGCGGCATGCTTAACACATGCAAGTCGCACGAGAGCTTCGGCTCTAGTGGCGGACGGGTGAGTAACGCGTAGGAATCTATCCATGGGTGGGGGATAACACTGGGAAACTGGTGCTAATACCGCATGATACCTGAGGGTCAAAGGCGCAAGTCGCCTGTGGAGGAGCCTGCGTTCGATTAGCTTGTTGGTGGGGTAATGGCCTACCAAGGCGATGATCGATAGCTGGTCTGAGAGGATGATCAGCCACACTGGGACTGAGACACGGCCCAG	GRM10JK03C3YRJ	Bacteria(100);Proteobacteria(100);Alphaproteobacteria(100);Rhodospirillales(100);Acetobacteraceae(100);Acetobacter(72);unclassified;unclassified;unclassified;	4.82523e-05	0	0	0	0	0	0	0	0	0.00195754	0.000648088	0	0	0	0	0	0	0	0	0	0	0	0	0	0	0	0	0	0	0	0	0	0	0	0	0	0	0	0	0	0	0	0	0	0
538	16	GATGAACGCTAGCTACAGGCTTAACACATGCAAGTCGAGGGGCATCAGGAAGAAAGCTTGCTTTCTTTGCTGGCGACCGGCGCACGGGTGAGTAACACGTATCCAACCTGCCCTTTACTCGGGGATAGCCTTTCGAAAGAAGGATTAATACCCGATGGCATAATGATTCCGCATGGTTTCATTATTAAAGGATTCCGGTAAAGGATGGGGATGCGTTCCATTAGGTTGTTGGTGAGGTAACGGCCCACCAAGCCTTCGATGGATAGGGGTTCTGAGAGGAAGGTCCCCCACATTGGAACTGAGACACGGTCCAA	GRM10JK03CVYWX	Bacteria(100);Bacteroidetes(100);Bacteroidia(100);Bacteroidales(100);Bacteroidaceae(100);Bacteroides(100);unclassified;unclassified;unclassified;	3.49615e-05	0	0	0	0	0	0	0	0	0	0	0	0	0	0	0	0	0.00111654	0	0	0	0	0	0	0	0	0	0	0	0	0	0	0	0	0	0	0	0	0	0	0.000771382	0	0	0	0
399	15	ATTGAACGCTGGCGGCAGGCTTAACACATGCAAGTCGAACGGTAACAGGGAGTAGCTTGCTACTTTGCTGACGAGTGGCGGACGGGTGAGTAATGTATGGGAATTTACCGAATGGAGGGGGACAACAGTTGGAAACGGCTGCTAATACCGCATAACGTCGCAAGACCAAAGAGTGGGACCTTCGGGCCACTTACCATTTGATGAGCCCATATGAGATTAGCTAGTTGGTGGGGTAAAGGCTCACCAAGGCGACGATCTCTAGCTGGTTTGAGAGGATGACCAGCCACACTGGGACTGAGACACGGCCCAG	GRM10JK03CX96Z	Bacteria(100);Proteobacteria(100);Gammaproteobacteria(100);Alteromonadales(19);Alteromonadaceae(13);Bowmanella(13);unclassified;unclassified;unclassified;	0.000126813	0	0	0	0	0	0	0	0	0	0	0	0	0.0031864	0.00366151	0	0	0	0	0	0	0	0	0	0	0	0	0	0	0	0	0	0	0	0	0	0	0	0	0	0	0	0	0	0
752	15	GATGAACGCTAGCGGGAGGCCTAACACATGCAAGCCGAGCGGTATTGTTTCTTCGGAAATGAGAGAGCGGCGTACGGGTGCGTAACACGTGTGCAACCTGCCTTTATCTGGGGGATAGCCTTTCGAAAGGAAGATTAATACTCCATAATATATTGAACGGCATCGTTTAATATTGAAAGCTCCGGCGGATAGAGATGGGCACGCGCAAGATTAGCTAGTTGGTGAGGTAACGGCTCACCAAGGCGATGATCTTTAGGGGGCCTGAGAGGGTGATCCCCCACACTGGTACTGAGACACGGACCAG	HDPIR2003F6U89	Bacteria(100);Bacteroidetes(100);Flavobacteria(100);Flavobacteriales(100);Flavobacteriaceae(100);Cloacibacterium(95);unclassified;unclassified;unclassified;	9.43215e-05	0	0	0	0	0	0	0	0	0	0	0	0	0.00424854	0	0	0	0	0	0	0	0	0	0	0	0	0	0	0	0	0	0.000506971	0	0	0	0	0	0	0	0	9.64227e-05	0.000241429	0	0	0
147	15	AGCGAACGCTGGCGGCATGCTTAACACATGCAAGTCGCACGAGAGCTTCGGCTCTAGTGGCGGACGGGTGAGTAACGCGTAGGGATCTATCCATGGGTGGGGGACAACTCCGGGAAACTGGAGCTAATACCGCATGATACCTGAGGGTCAAAGGCGCAAGTCGCCTGTGGAGGAACCTGCGTTCGATTAGCTAGTTGGTGGGGTAAAGGCCTACCAAGGCGATGATCGATAGCTGGTTTGAGAGGATGATCAGCCACACTGGGACTGAGACACGGCCCAG	GRM10JK03DA64J	Bacteria(100);Proteobacteria(100);Alphaproteobacteria(100);Rhodospirillales(100);Acetobacteraceae(100);Gluconobacter(99);unclassified;unclassified;unclassified;	4.66758e-05	0	0	0	0	0	0	0	0	0.00165638	0.000864118	0	0	0	0	0	0	0	0	0	0	0	0	0	0	0	0	0	0	0	0	0	0	0	0	0	0	0	0	0	0	0	0	0	0
577	14	AATGAACGCTGGCGGCAGGCCTAACACATGCAAGTCGGACGGCAGCGCGGGAGCAATCCTGGCGGCGAGTGGCGAACGGGTGAGTAATACATCGGAACATGTCCAGTAGTGGGGGATAGCCCGGCGAAAGCCGGATTAATACCGCATACGATCTATGGATGAAAGCGGGGGATCGCAAGACCTCGCGCTATTGGGGTGGCCGATGGCGGATTAGCTAGTTGGTGGGGTAAAGGCCTACCAAGGCGACGATCCGTAGCTGGTCTGAGAGGACGACCAGCCACACTGGGACTGAGACACGGCCCAG	G4S51TB02DYBDC	Bacteria(100);Proteobacteria(100);Betaproteobacteria(100);Burkholderiales(100);Burkholderiaceae(98);Burkholderia(98);unclassified;unclassified;unclassified;	0.000217447	0	0	0	0	0	0	0	0	0	0	0	0	0	0	0	0	0.000139567	0	0	0.00873362	0	0	0	0.00113593	0	0	0	0	0.000735294	0	0	0	0	0	0	0	0	0	0.000659848	9.64227e-05	0.000241429	0	0	0
337	14	ATTGAACGCTGGCGGCATGCCTTACACATGCAAGTCGAACGGTAACAGGTTAAGCTGACGAGTGGCGAACGGGTGAGTAATATATCGGAACGTGCCCAGTCGTGGGGGATAACTGCTCGAAAGAGCAGCTAATACCGCATACGACCTGAGGGTGAAAGCGGGGGATCGCAAGACCTCGCGCGATTGGAGCGGCCGATATCAGATTAGGTAGTTGGTGGGGTAAAGGCCCACCAAGCCAACGATCTGTAGCTGGTCTGAGAGGACGACCAGCCACACTGGGACTGAGACACGGCCCAG	HDPIR2003FPHTS	Bacteria(100);Proteobacteria(100);Betaproteobacteria(100);Burkholderiales(100);Comamonadaceae(100);Pelomonas(100);unclassified;unclassified;unclassified;	0.000146446	0.000224014	0	0	0	0	0	0	0.000395101	0	0	0	0	0.000531067	0	0	0	0.000279135	0	0	0.00436681	0	0	0	0	0	0	0	0	0.000490196	8.44167e-05	0	0	0	0	0.00107875	0	0	0	0	9.64227e-05	0.000362144	0	0	0
85	14	GATGAACGCTAACTACAGGCTTAACACATGCAAGTCGAGGGGCAGCATGAACTTAGCTTGCTAAGTTTGATGGCGACCGGCGCACGGGTGAGTAACACGTATCCAACCTGCCGATGACTCGGGGATAGCCTTTCGAAAGAAAGATTAATACCCGATGGCATAGTTCTTCCGCATGGTAGGACTATTAAAGAATTTCGGTCATCGATGGGGATGCGTTCCATTAGCTTGTTGGCGGGGTAACGGCCCACCAAGGCATCGATGGATAGGGGTTCTGAGAGGAAGGTCCCCCACATTGGAACTGAGACACGGTCCAA	GRM10JK03C4AW3	Bacteria(100);Bacteroidetes(100);Bacteroidia(100);Bacteroidales(100);Bacteroidaceae(100);Bacteroides(100);unclassified;unclassified;unclassified;	0.000136681	0	0	0	0	0	0	0	0	0	0	0	0	0	0	0	0	0	0.000237586	0	0	0	0	0.00604839	0	0	0.000234192	0	0	0	0	0	0	0	0	0	0	0	0	0.000329924	0.000289268	0.000241429	0	0	0
309	14	GAGTGAACGCTGGCGGCGTGCCTAATACATGCAAGTCGAACGCACGACTCACCGAAGCTTGCTTTGGTGACAAGTGAGTGGCGGACGGGTGAGTAACACGTGGGTAACCTGCCTATCAGAGGGGGATAACACTTGGAAACAGGTGCTAATACCGCATAGATTTTTGTTTCGCATGAAACGAAGAGGAAAGACGCTTTCGGGTGTCACTGATAGATGGACCCGCGGTGCATTAGCTAGATGGTGAGGTAACGGCTCACCATGGCGATGATGCATAGCCGACCTGAGAGGGTGATCGGCCACACTGGGACTGAGACACGGCCCAG	G4S51TB02D74SR	Bacteria(100);Firmicutes(100);Bacilli(100);Lactobacillales(100);PeH36(100);unclassified;unclassified;unclassified;unclassified;	9.16891e-05	0	0	0	0	0	0	0.00104123	0	0	0	0	0	0.00106213	0.00284784	0	0	0	0	0	0	0	0	0	0	0	0	0	0	0	0	0	0	0	0	0	0	0	0	0	0	0	0	0	0
189	14	ATTGAACGCTGGCGGCATGCTTTACACATGCAAGTCGAACGGCAGCATGGGCTTCGGCCTGATGGCGAGTGGCGAACGGGTGAGTAATACATCGGAACATACCTAGTTGTGGGGGACAACTACTCGAAAGAGTAGCTAATACCGCATAAGATCTACGGATGAAAGCAGGGGACCTTTGGGCCTTGCGCAATTAGAGTGGCCGATGGCAGATTAGGTAGTTGGTGAGGTAAAGGCTCACCAAGCCTGCGATCTGTAGCTGGTCTGAGAGGACGACCAGCCACACTGGGACTGAGACACGGCCCAG	G4S51TB02EQZMK	Bacteria(100);Proteobacteria(100);Betaproteobacteria(100);Burkholderiales(95);Comamonadaceae(95);Comamonas(61);unclassified;unclassified;unclassified;	8.61261e-05	0	0	0	0	0	0	0	0	0	0	0.000147667	0.0012826	0.0015932	0.00162734	0	0	0	0	0	0	0	0	0	0	0	0	0	0	0	0	0	0	0	0	0	0	0	0	0	0	0	0	0	0
979	14	AGCGAACGCTGGCGGCAGGCCTAACACATGCAAGTCGAACGGATCCTTCGGGATTAGTGGCGGACGGGTGAGTAACACGTGGGAACGTGCCCTTTGGTTCGGAACAACTCAGGGAAACTTGAGCTAATACCGGATGTGCCCTTTGGGGGAAAGATTTATCGCCATTGGAGCGGCCCGCGTCTGATTAGCTAGTTGGTGAGGTAAAGGCTCACCAAGGCGACGATCAGTAGCTGGTCTGAGAGGATGATCAGCCACATTGGGACTGAGACACGGCCCAA	GRM10JK03DL2OB	Bacteria(100);Proteobacteria(100);Alphaproteobacteria(100);Caulobacterales(100);Caulobacteraceae(100);Caulobacter(98);unclassified;unclassified;unclassified;	3.0296e-05	0	0	0	0	0	0	0	0	0	0	0	0	0	0	0	0	0.000139567	0	0	0	0	0	0	0	0	0	0	0	0	0	0	0	0	0	0	0	0	0	0	0.000289268	0.00120715	0	0	0
[truncated: 10 more columns]
